# Supplementary material
Source: publisher figshare collection journal article supplement (https://tandf.figshare.com/ndownloader/files/22515662)
Supplement: Supplementary file 1 [file 22515662]

**Supporting Information**

Magnetically recoverable ferromagnetic 3D hierarchical core-shell Fe3O4@NiO/Co3O4 microspheres as an efficient and ligand-free catalyst for C-S bond formation in poly (ethylene glycol)

Ahad Vatandoust Namnloo, Batool Akhlaghinia*****, Arezou Mohammadinezhad

******Department of Chemistry, Faculty of Science, Ferdowsi University of Mashhad, Mashhad 9177948974, Iran.*

**Experimental**

***General***

All chemical reagents and solvents were purchased from Merck chemical company and were used as received without further purification. The purity determinations of the products and the progress of the reactions were accomplished by thin layer chromatography on silica gel polygram STL G/UV 254 plates. The melting points of the products were determined with an Electrothermal Type 9100 melting point apparatus. Mass spectra were recorded with a CH7A Varianmat Bremen instrument at 70 eV electron impact ionization, in m/z (rel.%). The NMR spectra were recorded on a Bruker Avance 400 MHz instrument in CDCl3 and DMSO-*d6* as the solvents. All yields refer to the isolated products after purification by thin layer chromatography.

**Diphenyl sulfide[1] (1a)**

Diphenyl sulfide (0.176 g, 95%); Colorless oil; 1H NMR (400 MHz, CDCl3): δ [ppm] = 7.34-7.31 (m, 5H), 7.29-7.25 (m, 3H), 7.23-7.19 (m, 2H); 13C NMR (100 MHz, CDCl3): δ [ppm] = 135.9, 131.2, 129.4, 127.2; MS (70 eV, EI); *m/z* (%): 186 (M+, 12 %), 184 (M-2, 100%), 108 (C6H4S, 90%), 76 (C6H4, 42%), 65 (C5H5, 40%), 51 (C4H3, 28%).


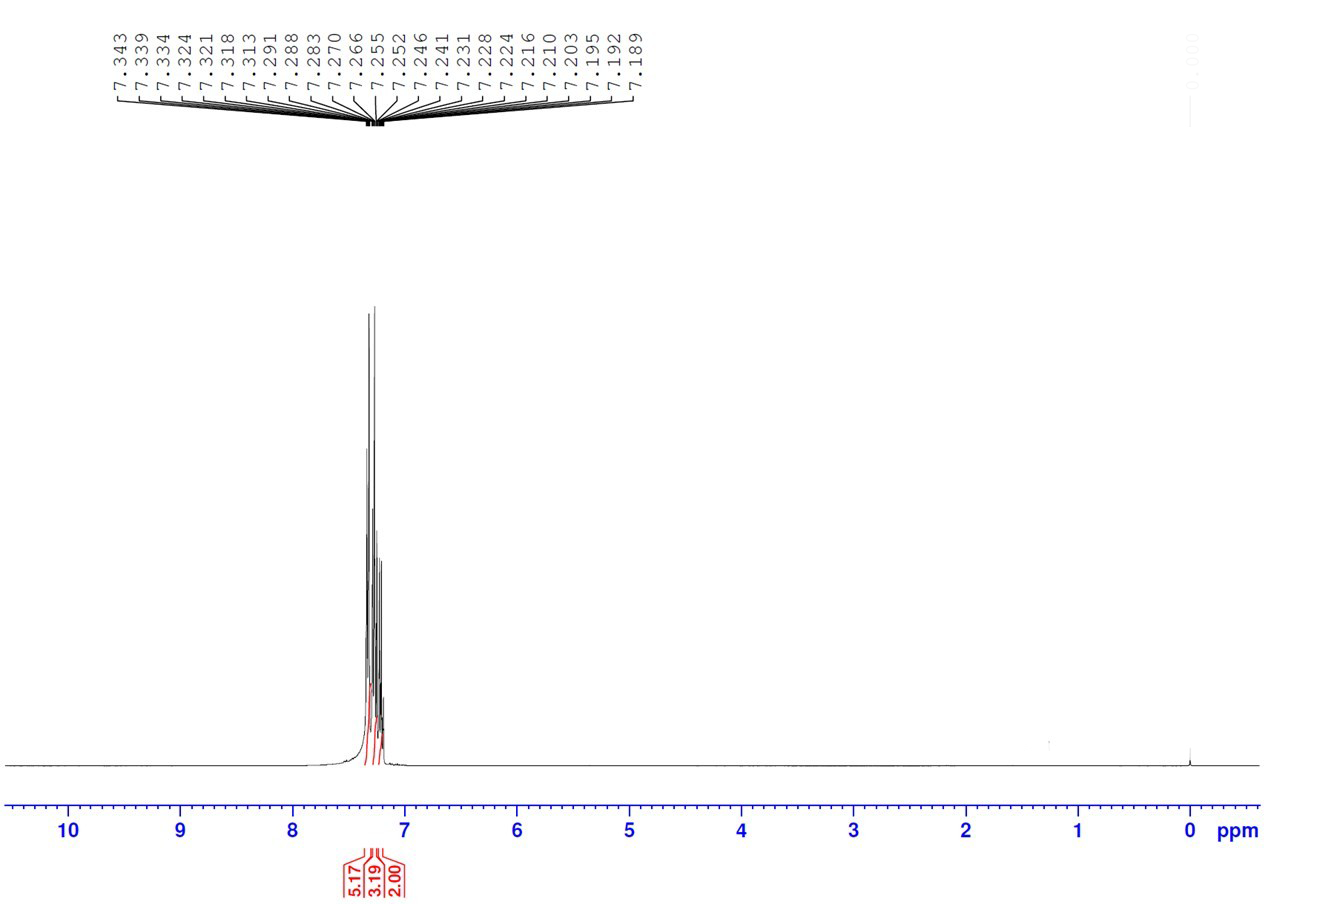


**Figure 1**: 1H NMR (400 MHz, CDCl3) of Diphenyl sulfide (**1a**).


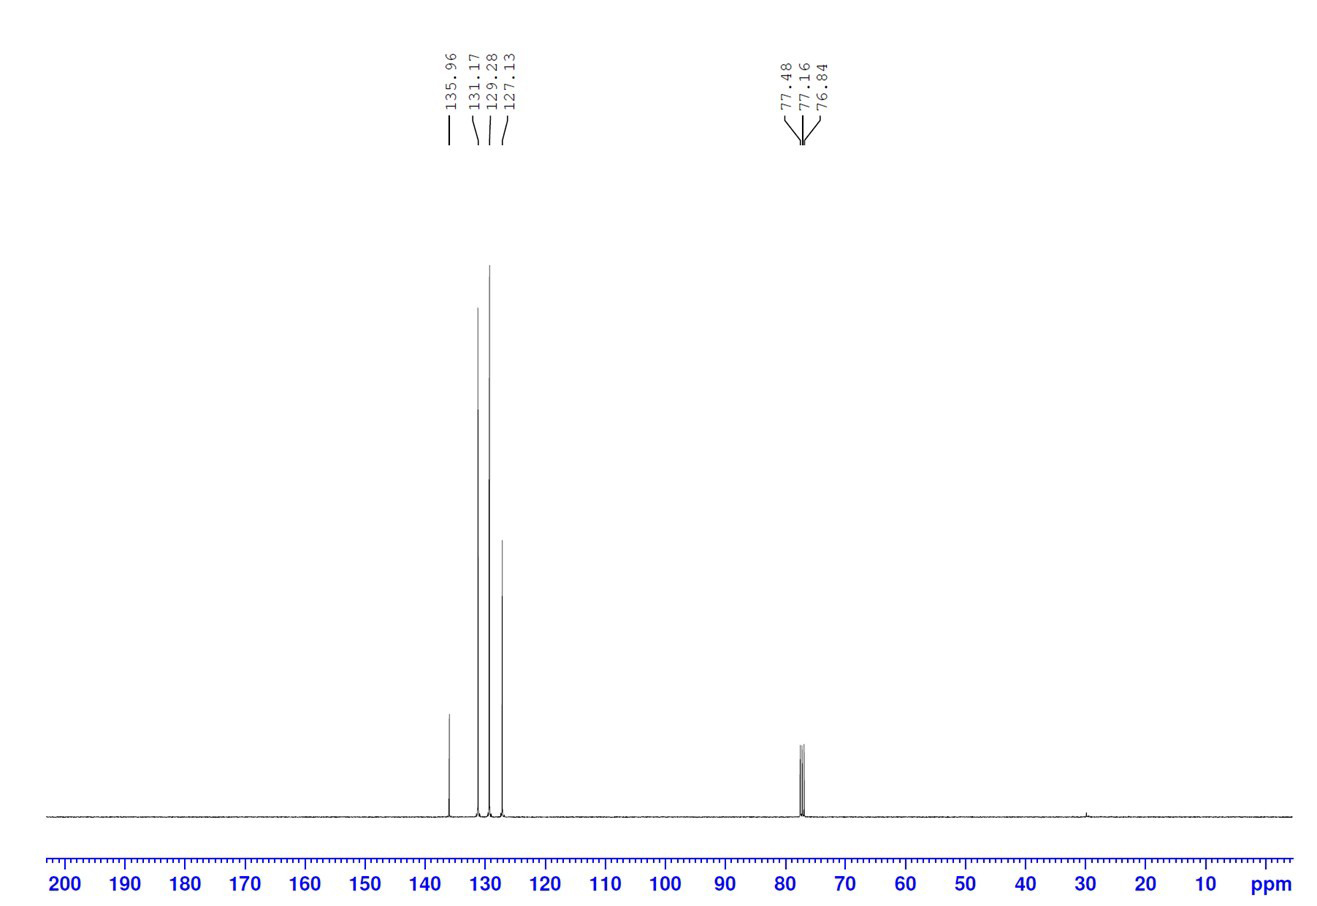


**Figure 2**: 13C NMR (100 MHz, CDCl3) of Diphenyl sulfide (**1a**).


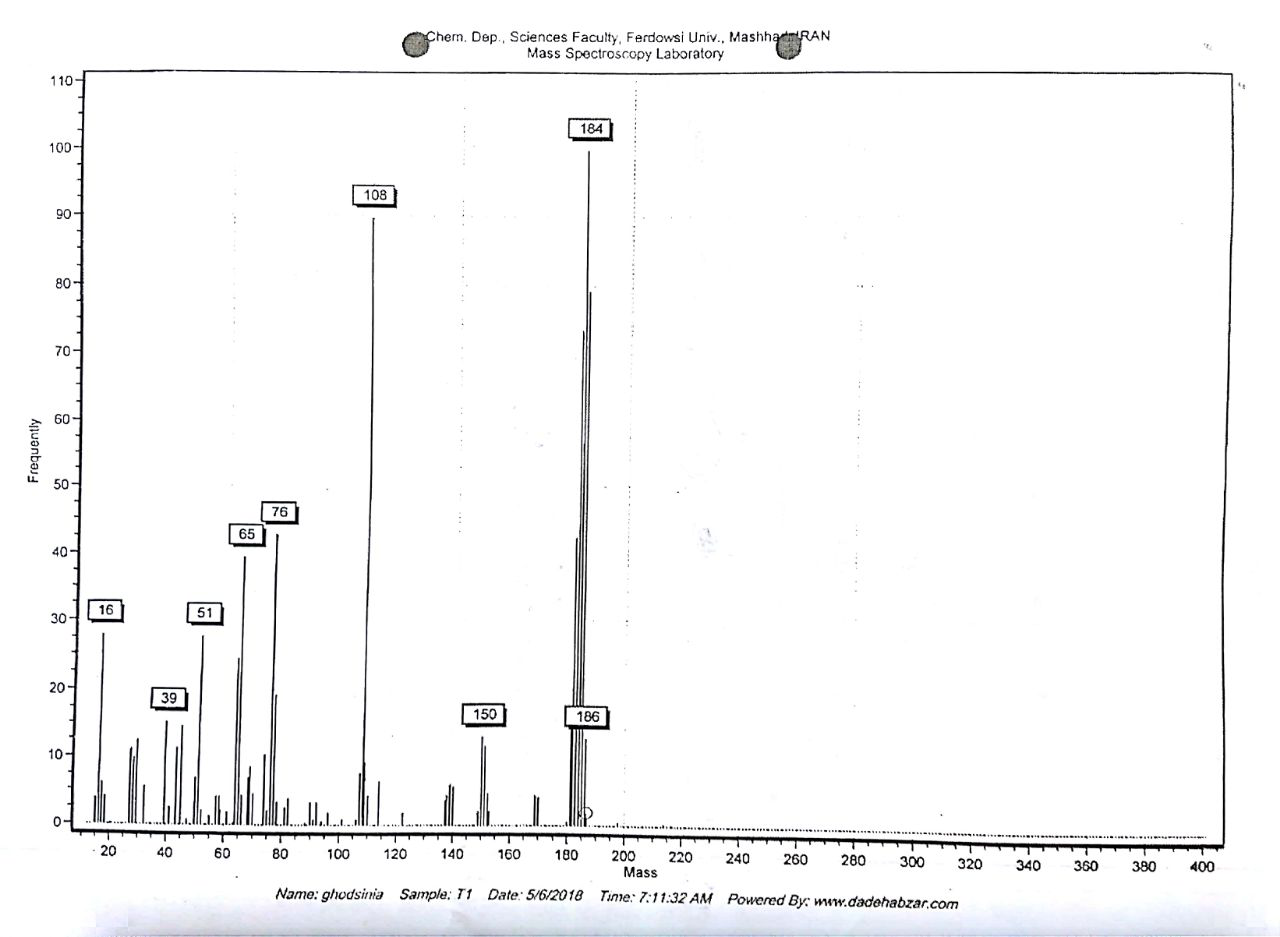


**Figure 3**: Mass spectrum of Diphenyl sulfide (**1a**).

**4,4'-Thiodibenzonitrile[1] (2b)**

4,4'-Thiodibenzonitrile (0.198 g, 84%); Yellow solid; mp 134-135 °C (Lit. 134 – 135 °C); 1H NMR (400 MHz, CDCl3): δ [ppm] = 7.43 (d, *J* = 8.8 Hz, 4 H, Ar-H), 7.19 (d, *J* = 8.4 Hz, 4 H, Ar-H); 13C NMR (100 MHz, CDCl3): δ [ppm] = 140.6, 133.0, 131.2, 118.2, 111.4.

**
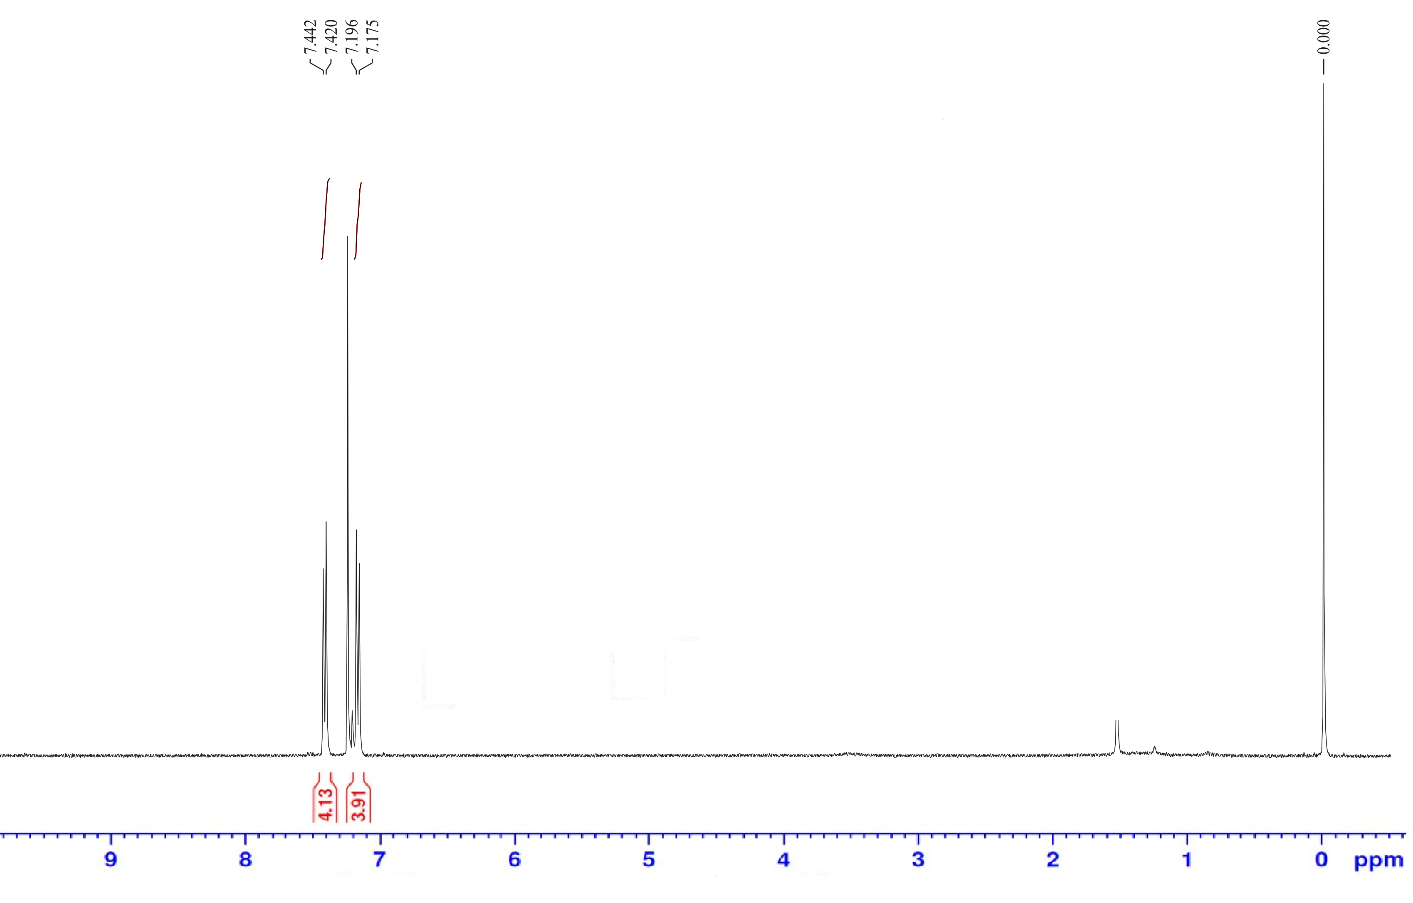
**

**Figure 4**: 1H NMR (400 MHz, CDCl3) of 4,4'-Thiodibenzonitrile (**2b**).

**
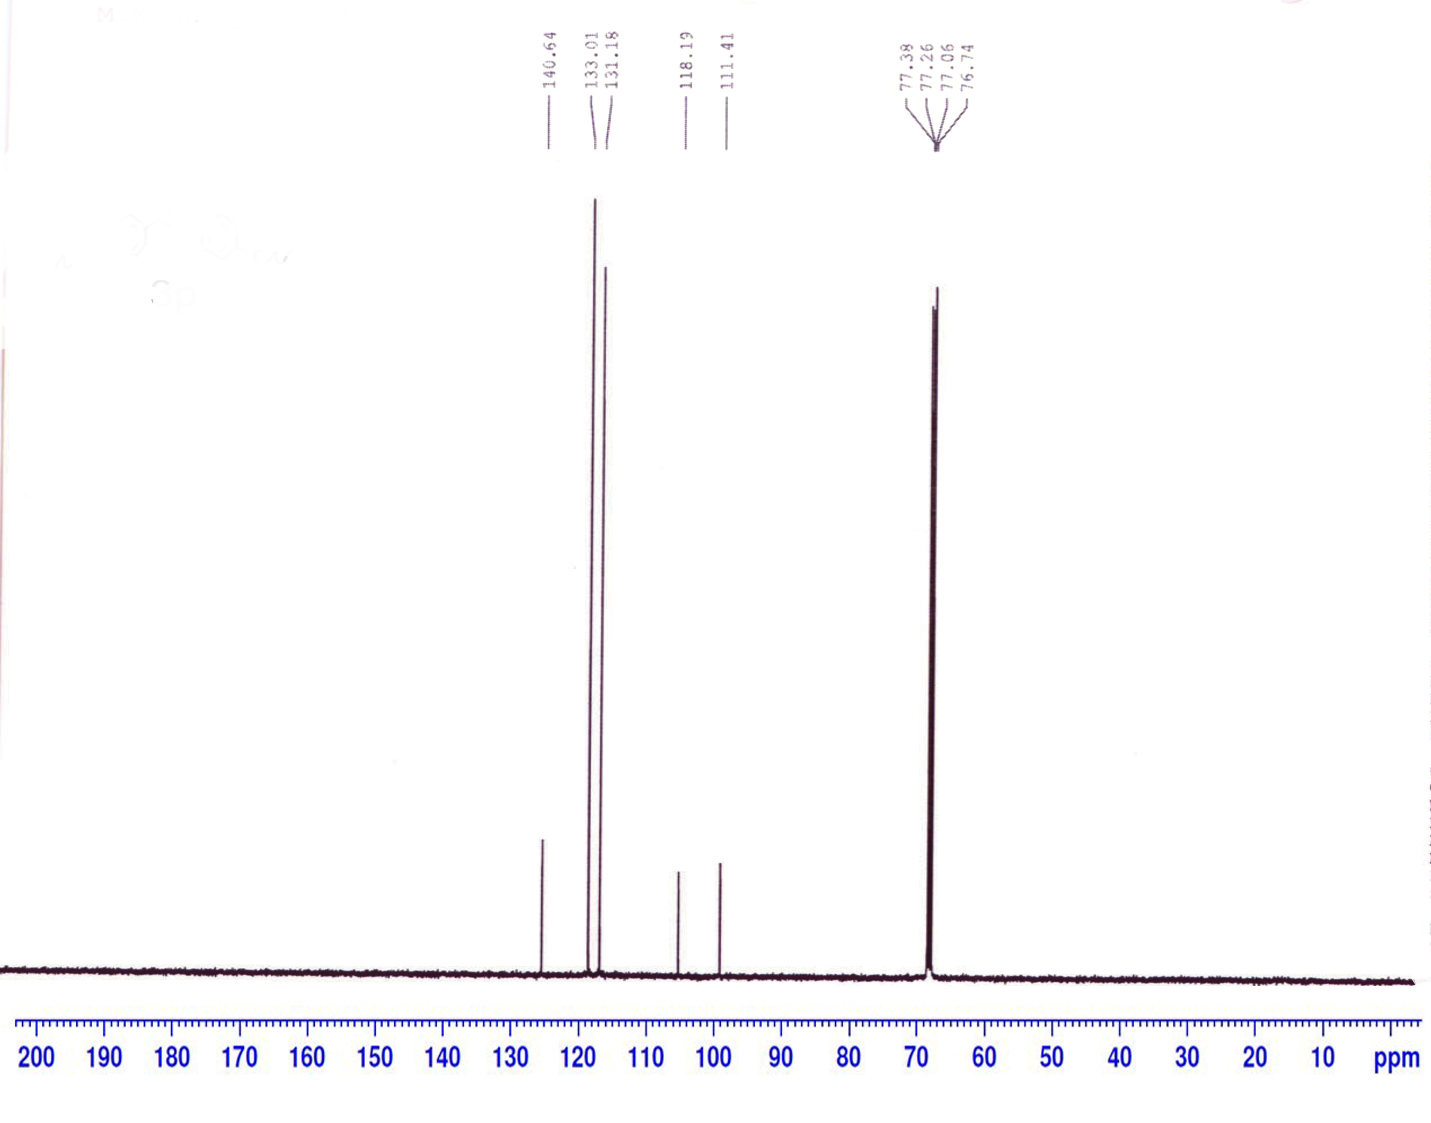
**

**Figure 5**: 13C NMR (100 MHz, CDCl3) of 4,4'-Thiodibenzonitrile (**2b**).

**Bis (4-nitrophenyl) sulfane[1] (3c)**

Bis (4-nitrophenyl) sulfane (0.231g, 84%); Yellow solid; mp 149-150 °C (Lit.149-150 °C); 1H NMR (400 MHz, DMSO-*d6*): δ [ppm] = 8.25 (dd, *J* = 8.4, 1.6 Hz, 4H), 7.64 (dd, *J* = 8.4, 2.0 Hz, 4H); 13C NMR (100 MHz, DMSO-*d6*): δ [ppm] = 146.7, 142.2, 131.3, 124.8; MS (70 eV, EI), *m/z* (%): 276 (M+,20%), 275 (M-1, 40%), 123 (C6H5NO2, 90%).


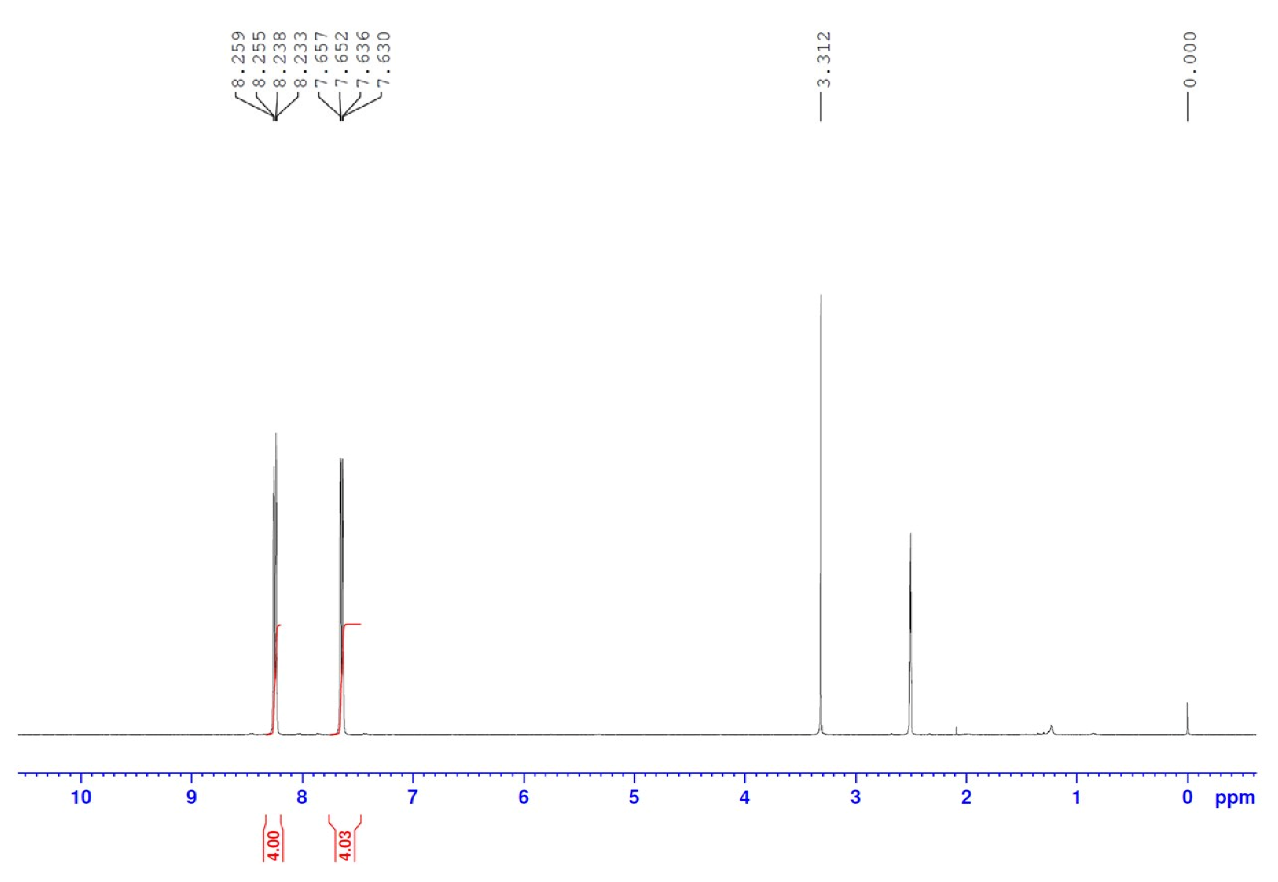


**Figure 6**: 1H NMR (400 MHz, DMSO-*d6*) of Bis (4-nitrophenyl) sulfane (**3c**).


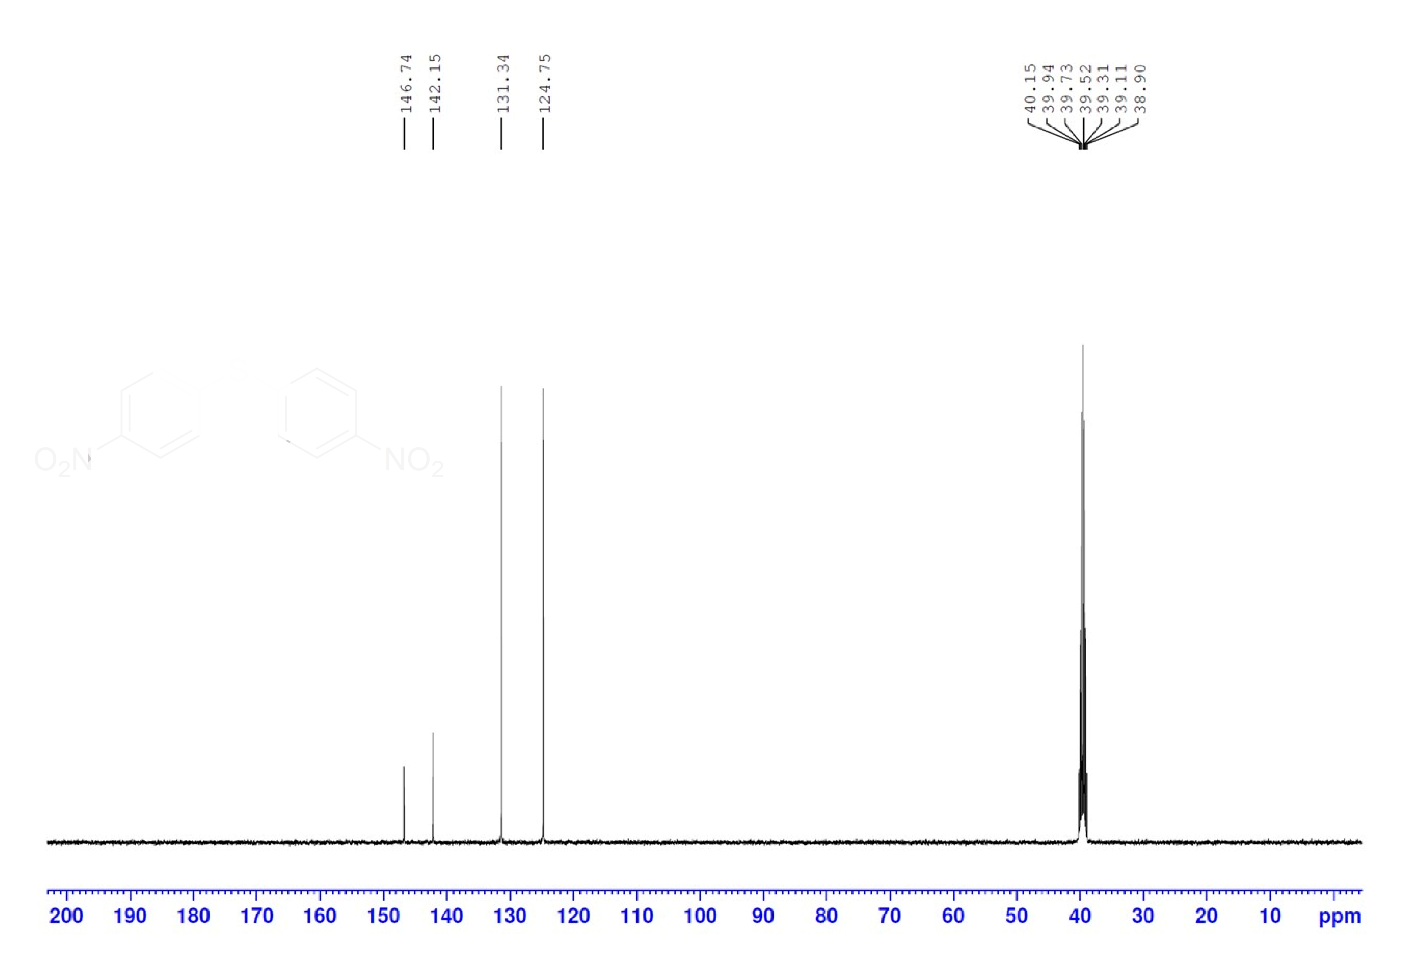


**Figure 7**: 13C NMR (100 MHz, DMSO-*d6*) of Bis (4-nitrophenyl) sulfane (**3c**).


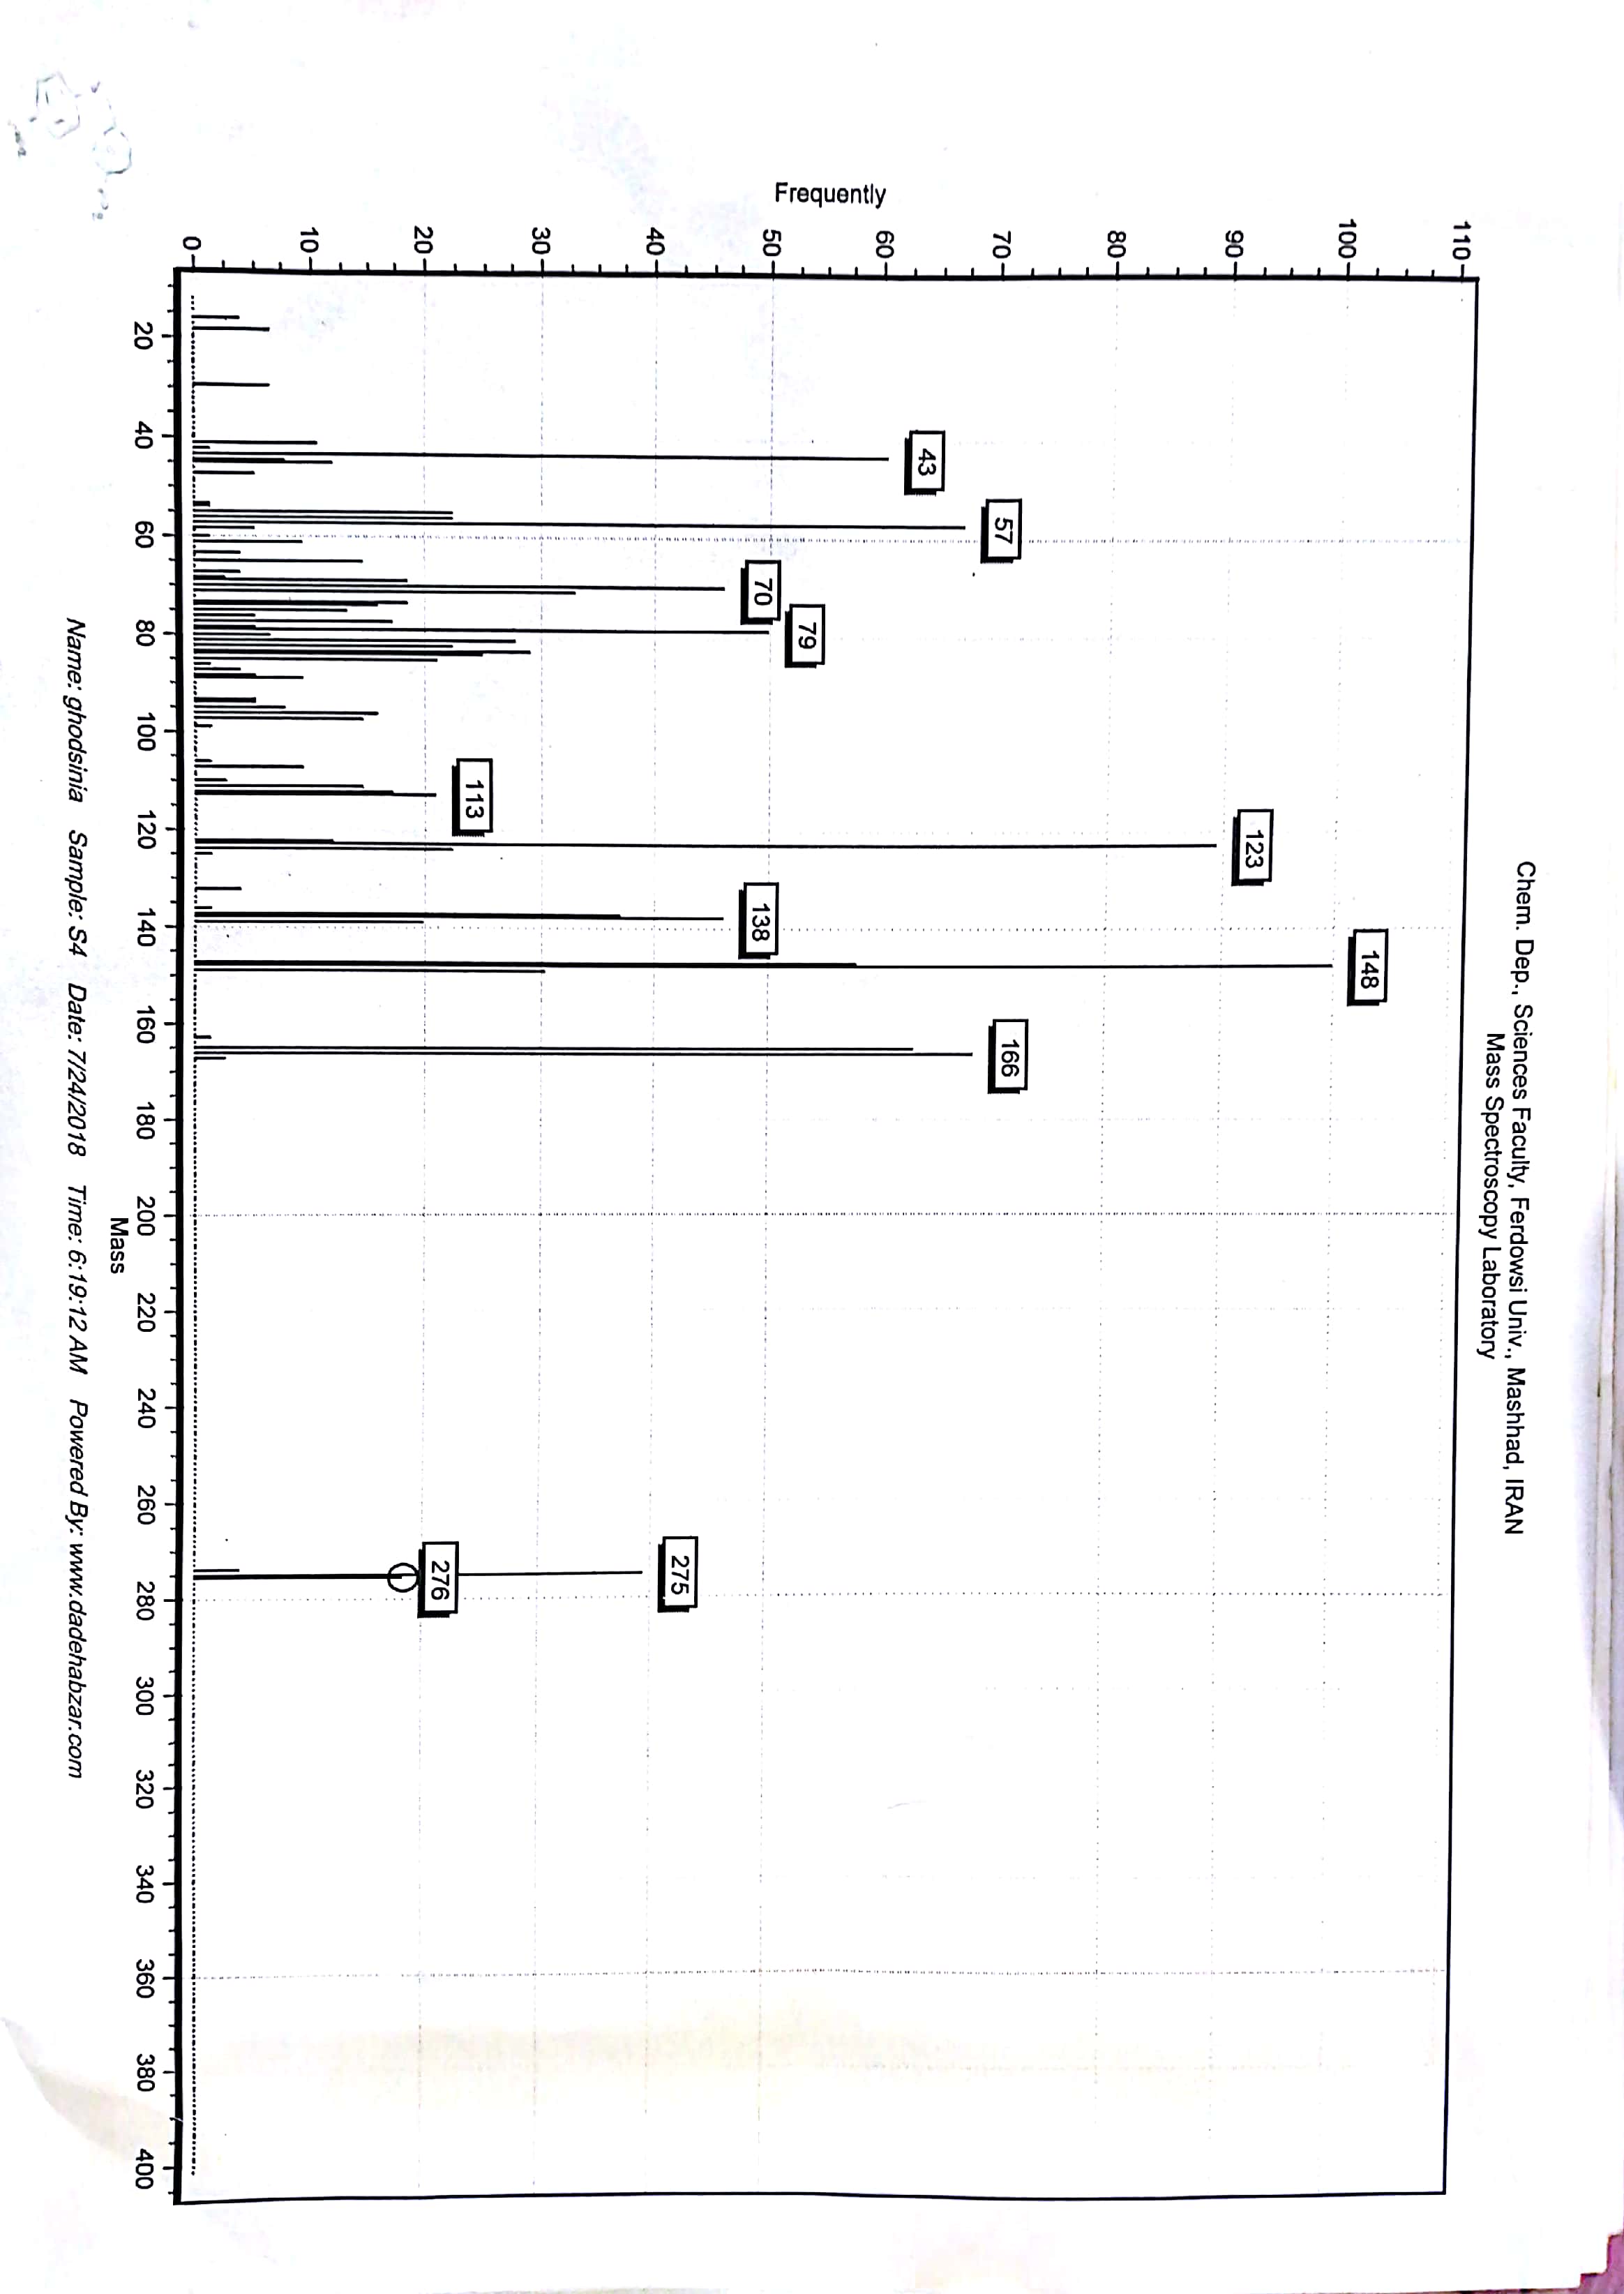


**Figure 8**: Mass spectrum of Bis (4-nitrophenyl) sulfane (**3c**).

**Bis (4-chlorophenyl) sulfane[2] (4d)**

Bis (4-cholorophenyl) sulfane (0.123g, 45%); white solid; mp 89-90 °C (Lit. 91-92 °C); MS (70 eV, EI), *m/z* (%): 254(M+,100%), 256 (M+2, 66%), 218 (C12H8ClS, 20%), 184 (C12H8S, 82%), 143 (C6H4ClS,18%), 108 (C6H4S,28%).


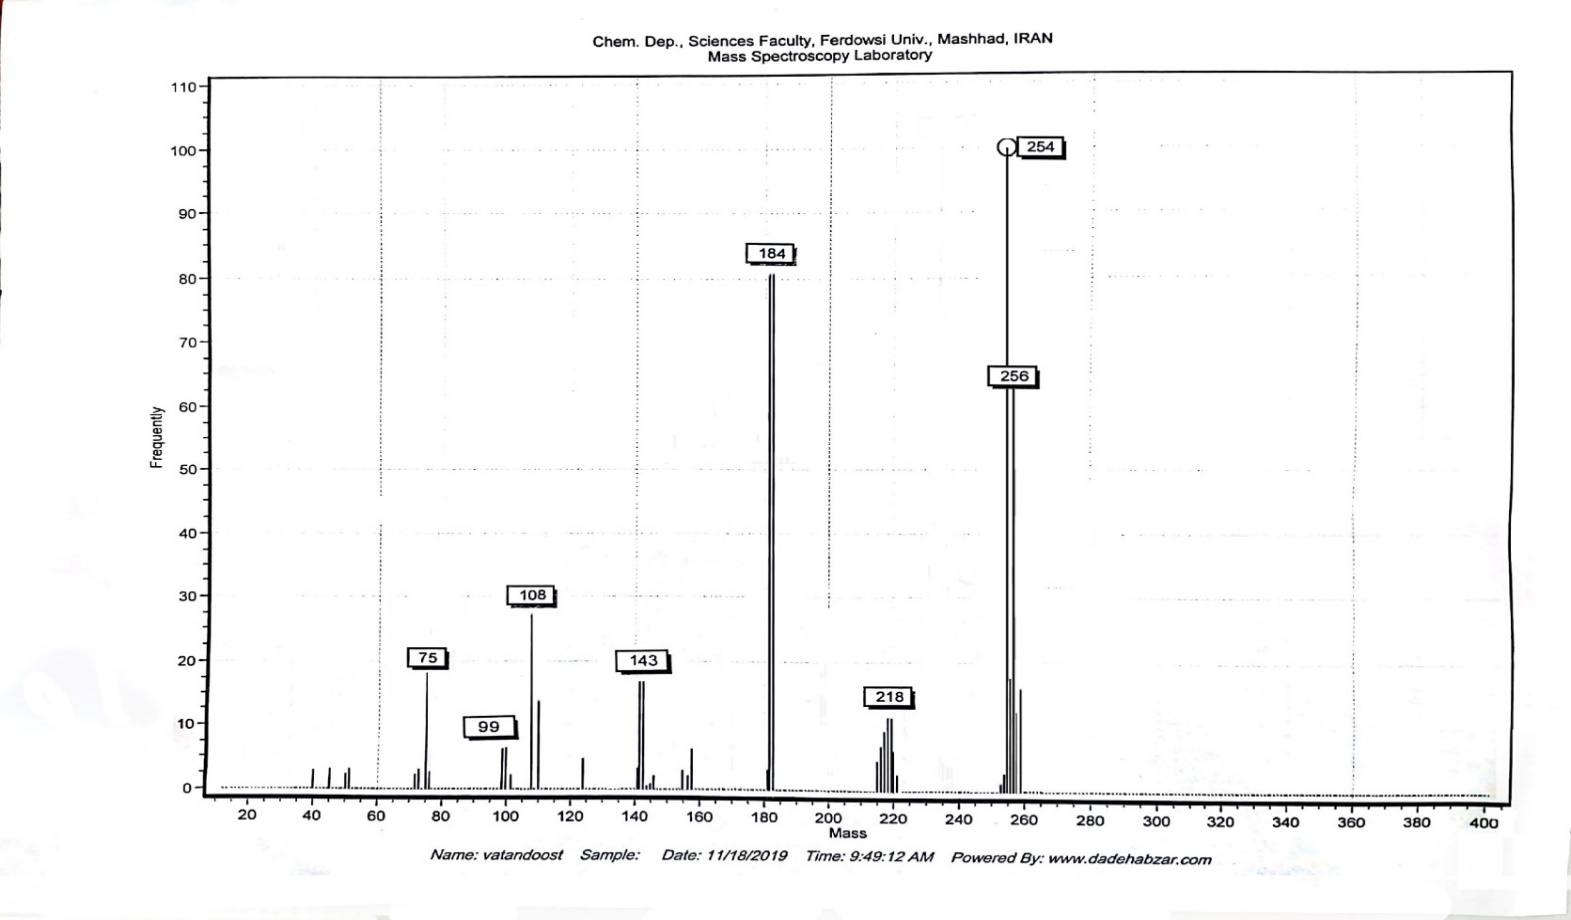


**Figure 9**: Mass spectrum of Bis (4-chlorophenyl) sulfane (**4d**)

.

**Di-(*p*-tolyl) sulfane[1] (5e)**

Di-(*p*-tolyl) sulfane (0.158 g, 74%); Colorless oil; (Lit.43–46 °C); 1H NMR (400 MHz, CDCl3): δ [ppm] = 7.23 (d, *J* = 8.4 Hz, 4 H, Ar-H), 7.10 (d, *J* = 7.6 Hz, 4H, ArH), 2.32 (s, 6H, CH3); 13C NMR (100 MHz, CDCl3): δ [ppm] = 137.1, 132.8, 131.2, 130.1, 21.3; MS (70 eV, EI), *m/z* (%): 212 (M-2, 50%), 91 (C7H7, 67%).


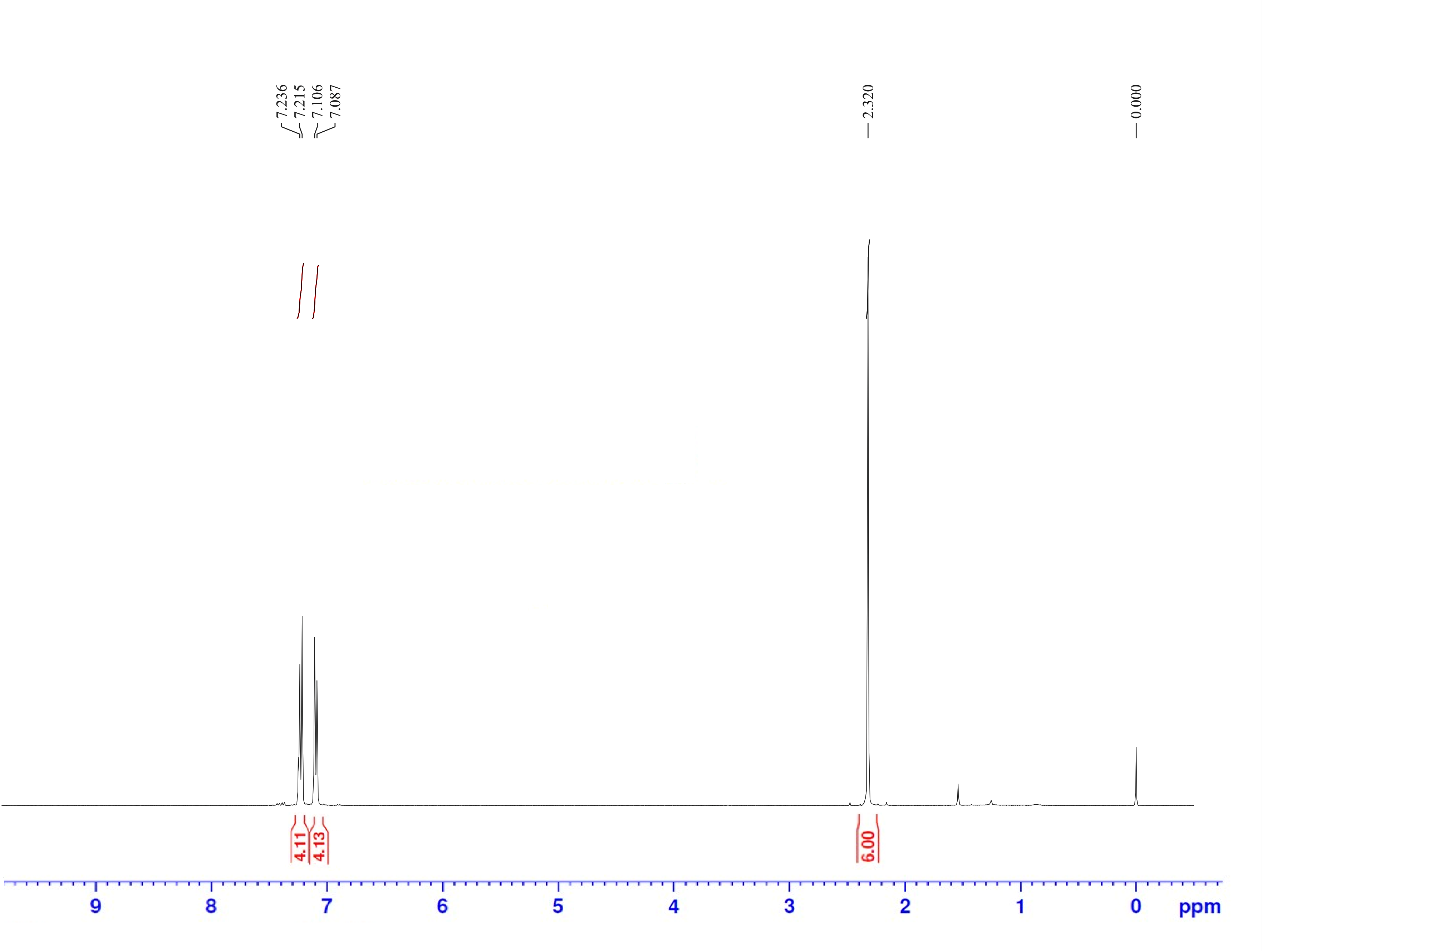


**Figure 10**: 1H NMR (400 MHz, CDCl3) of Di-(*p*-tolyl) sulfane (**5e**).


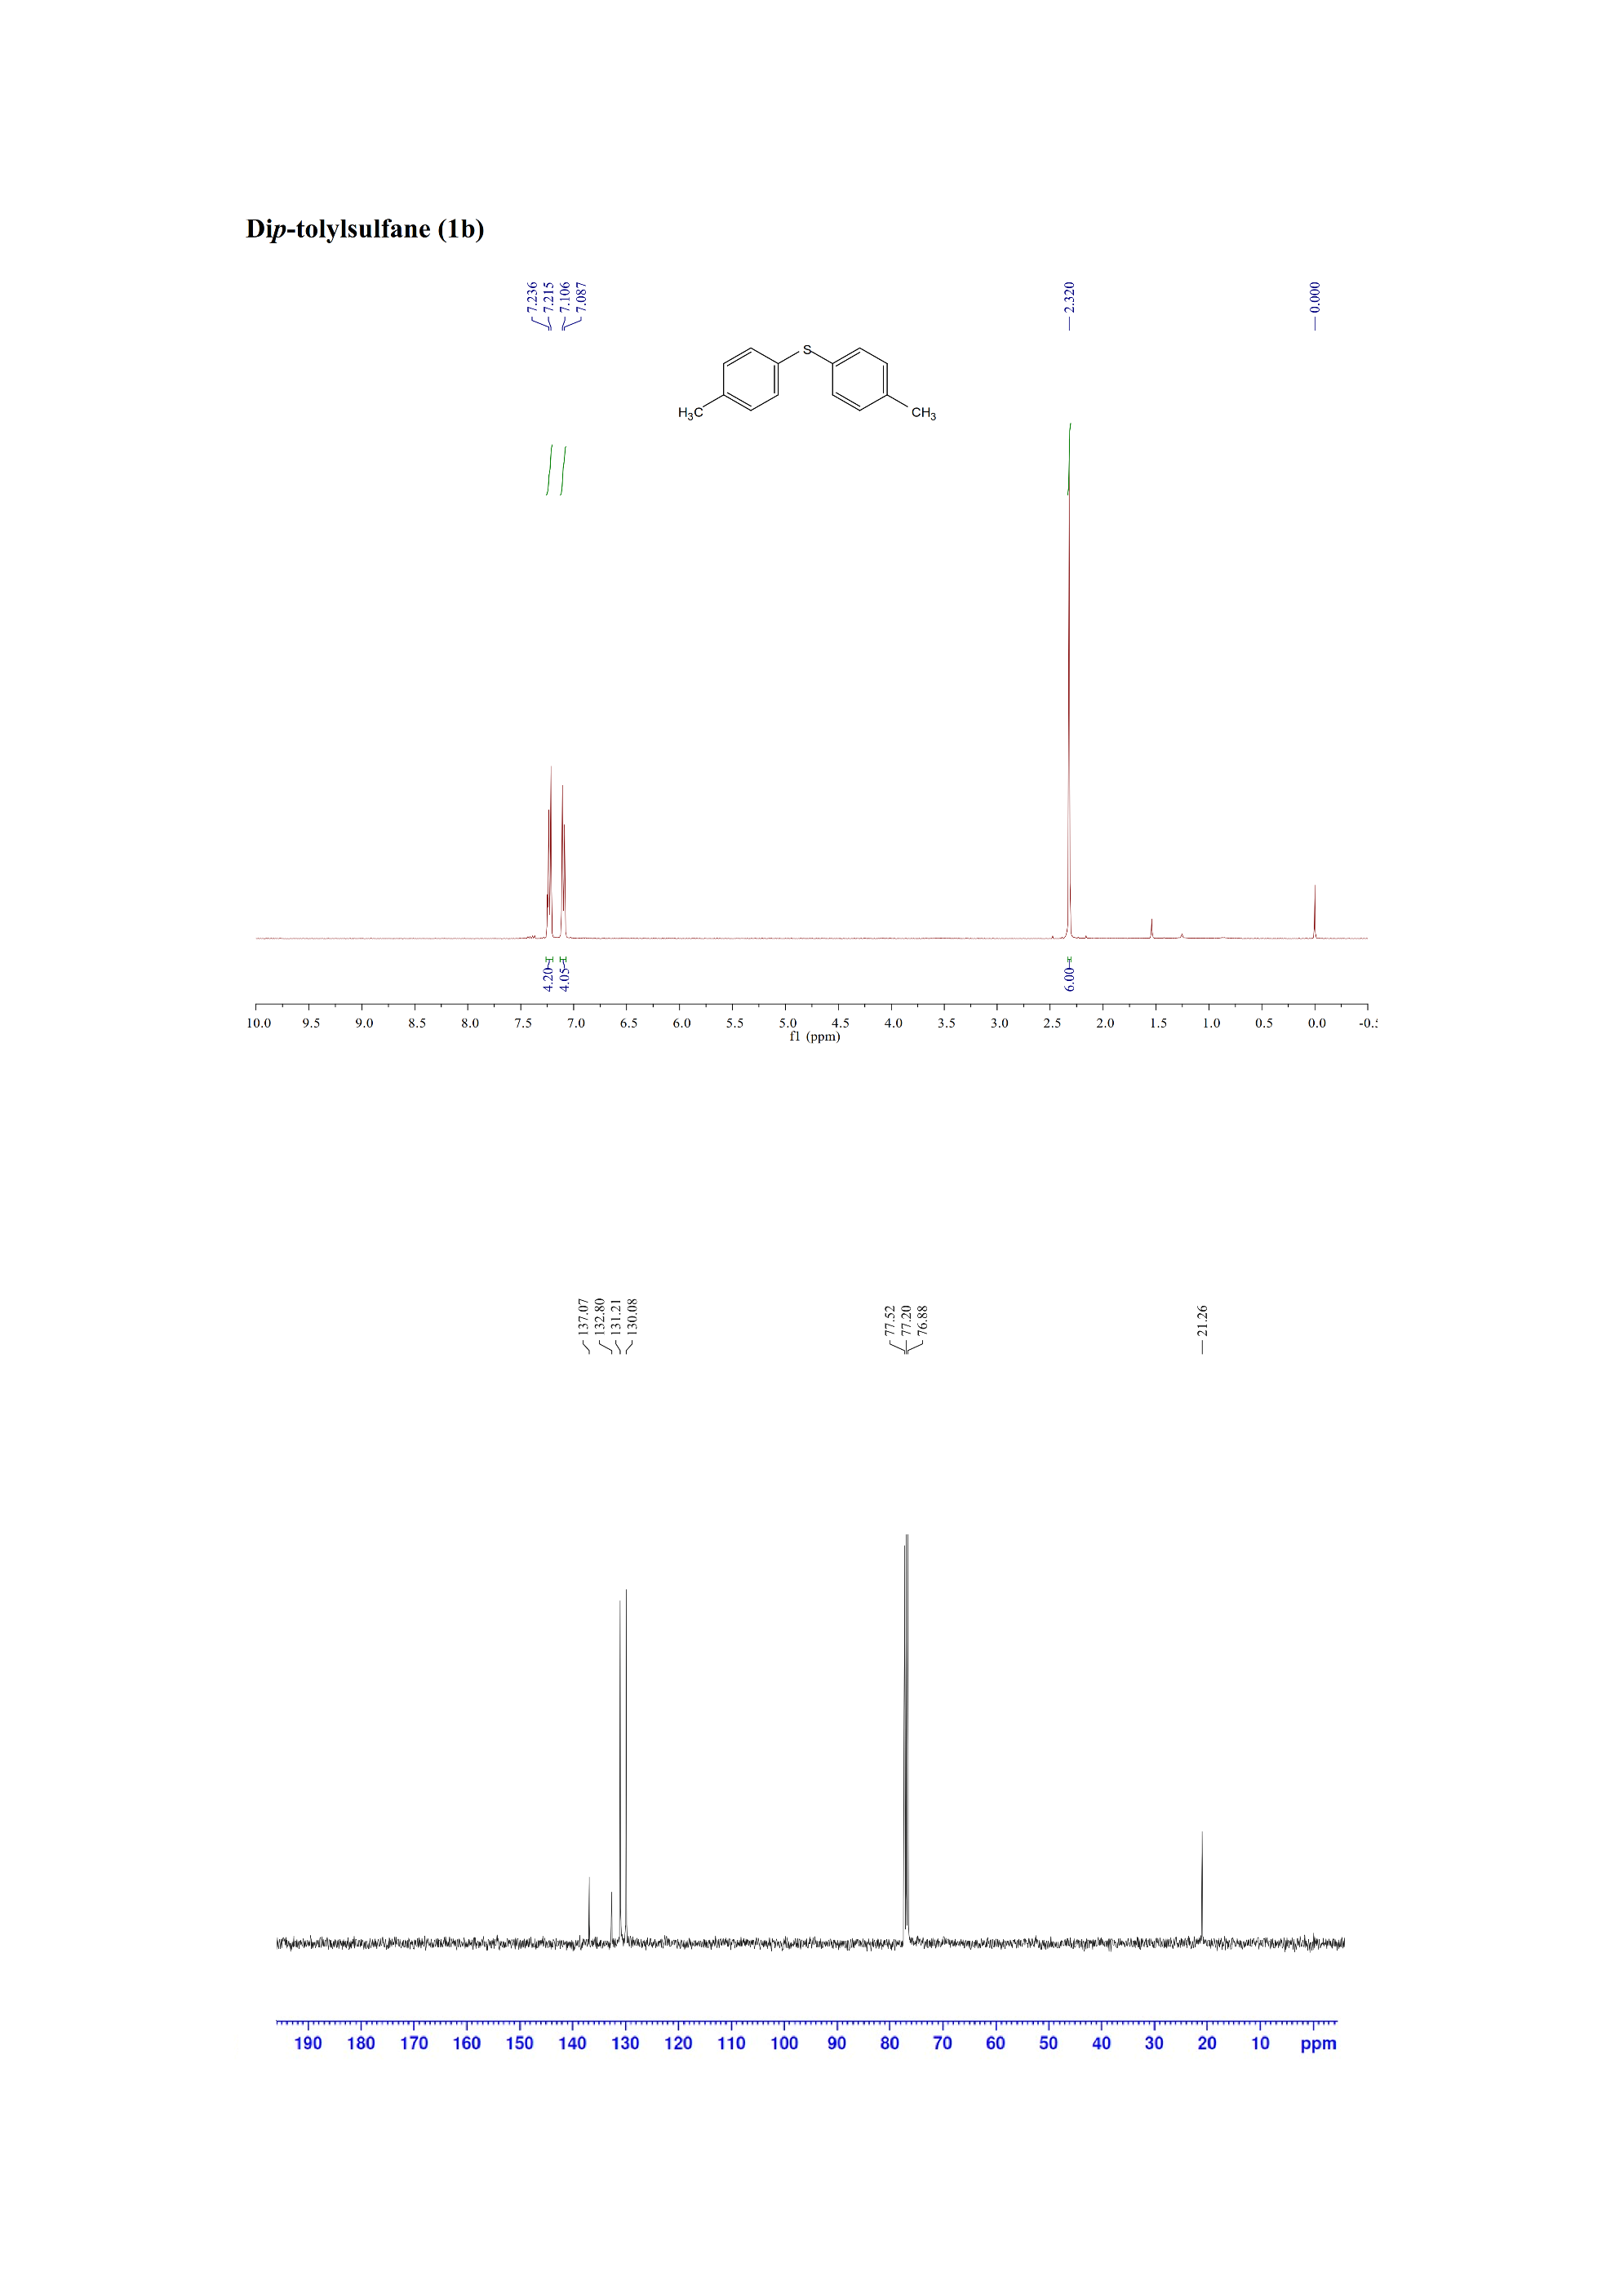


**Figure 11**: 13CNMR (100 MHz, CDCl3) of Di-(*p*-tolyl) sulfane (**5e**).


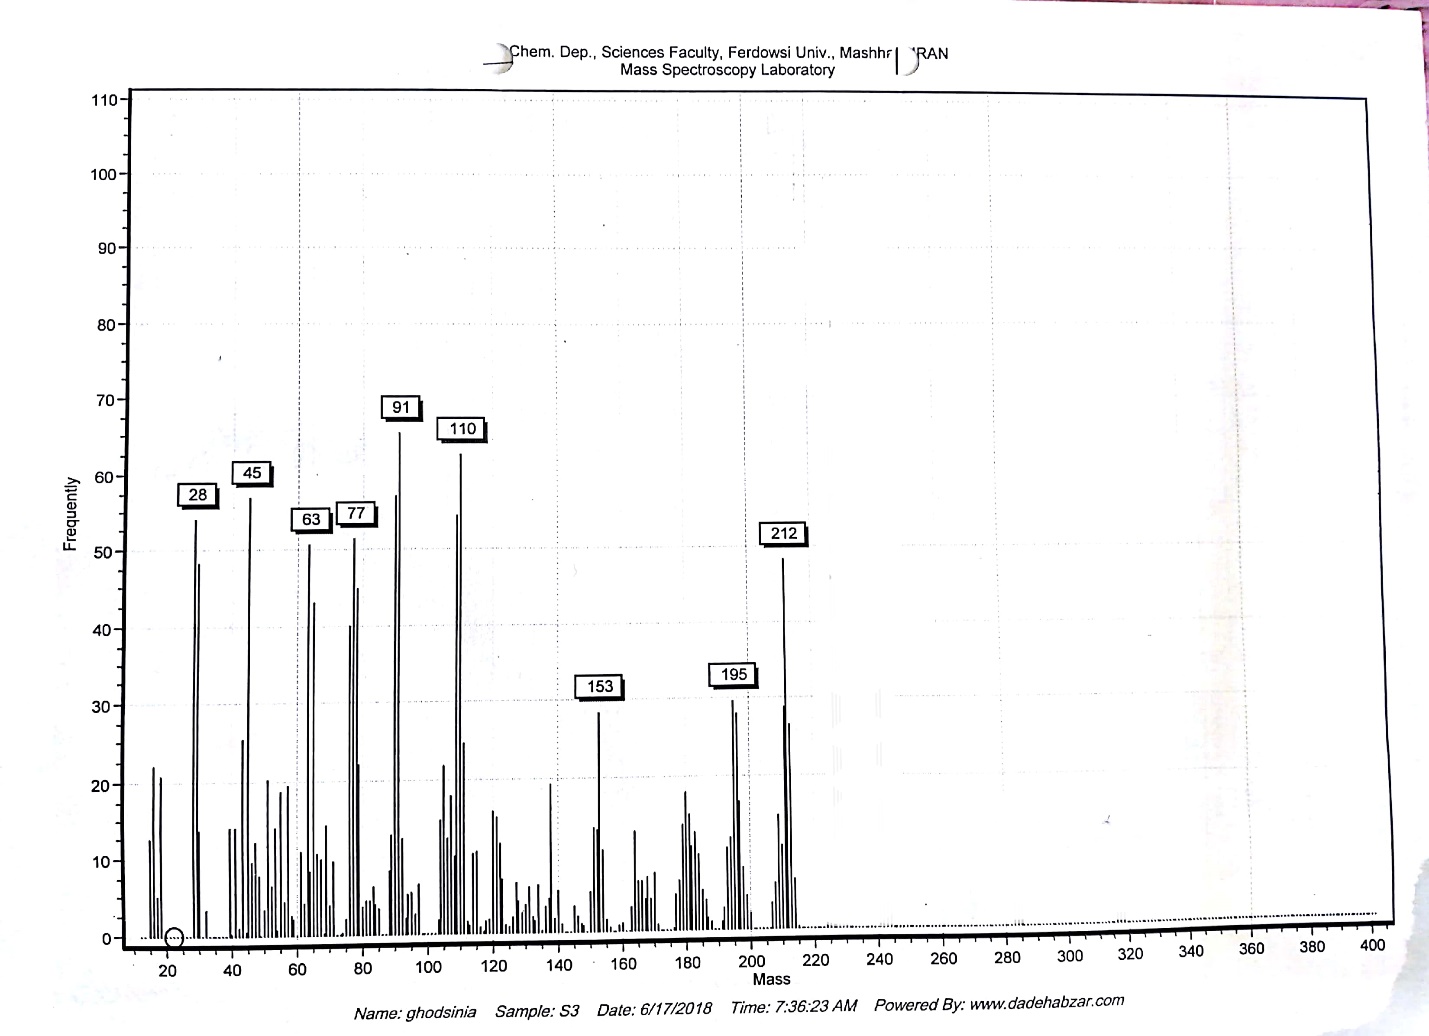


**Figure 12**: Mass spectrum of Di-(*p*-tolyl) sulfane (**5e**).

**Bis (4-methoxyphenyl) sulfane[1] (6f)**

Bis (4-methoxyphenyl) sulfane(0.172g, 70%); Yellow liquid; 1H NMR (400 MHz, CDCl3): δ [ppm] = 7.27 (d, *J* = 8.8 Hz, 4 H, Ar-H), 6.83 (d, *J* = 8.8 Hz, 4 H, Ar-H), 3.78 (s, 6 H, OCH3); 13C NMR (100 MHz, CDCl3): δ [ppm] = 159.1, 132.9, 127.6, 114.9, 55.5; MS (70 eV, EI), *m/z* (%): 246 (M+, 5 %), 243 (M-2, 65%), 77 (C6H5, 80).


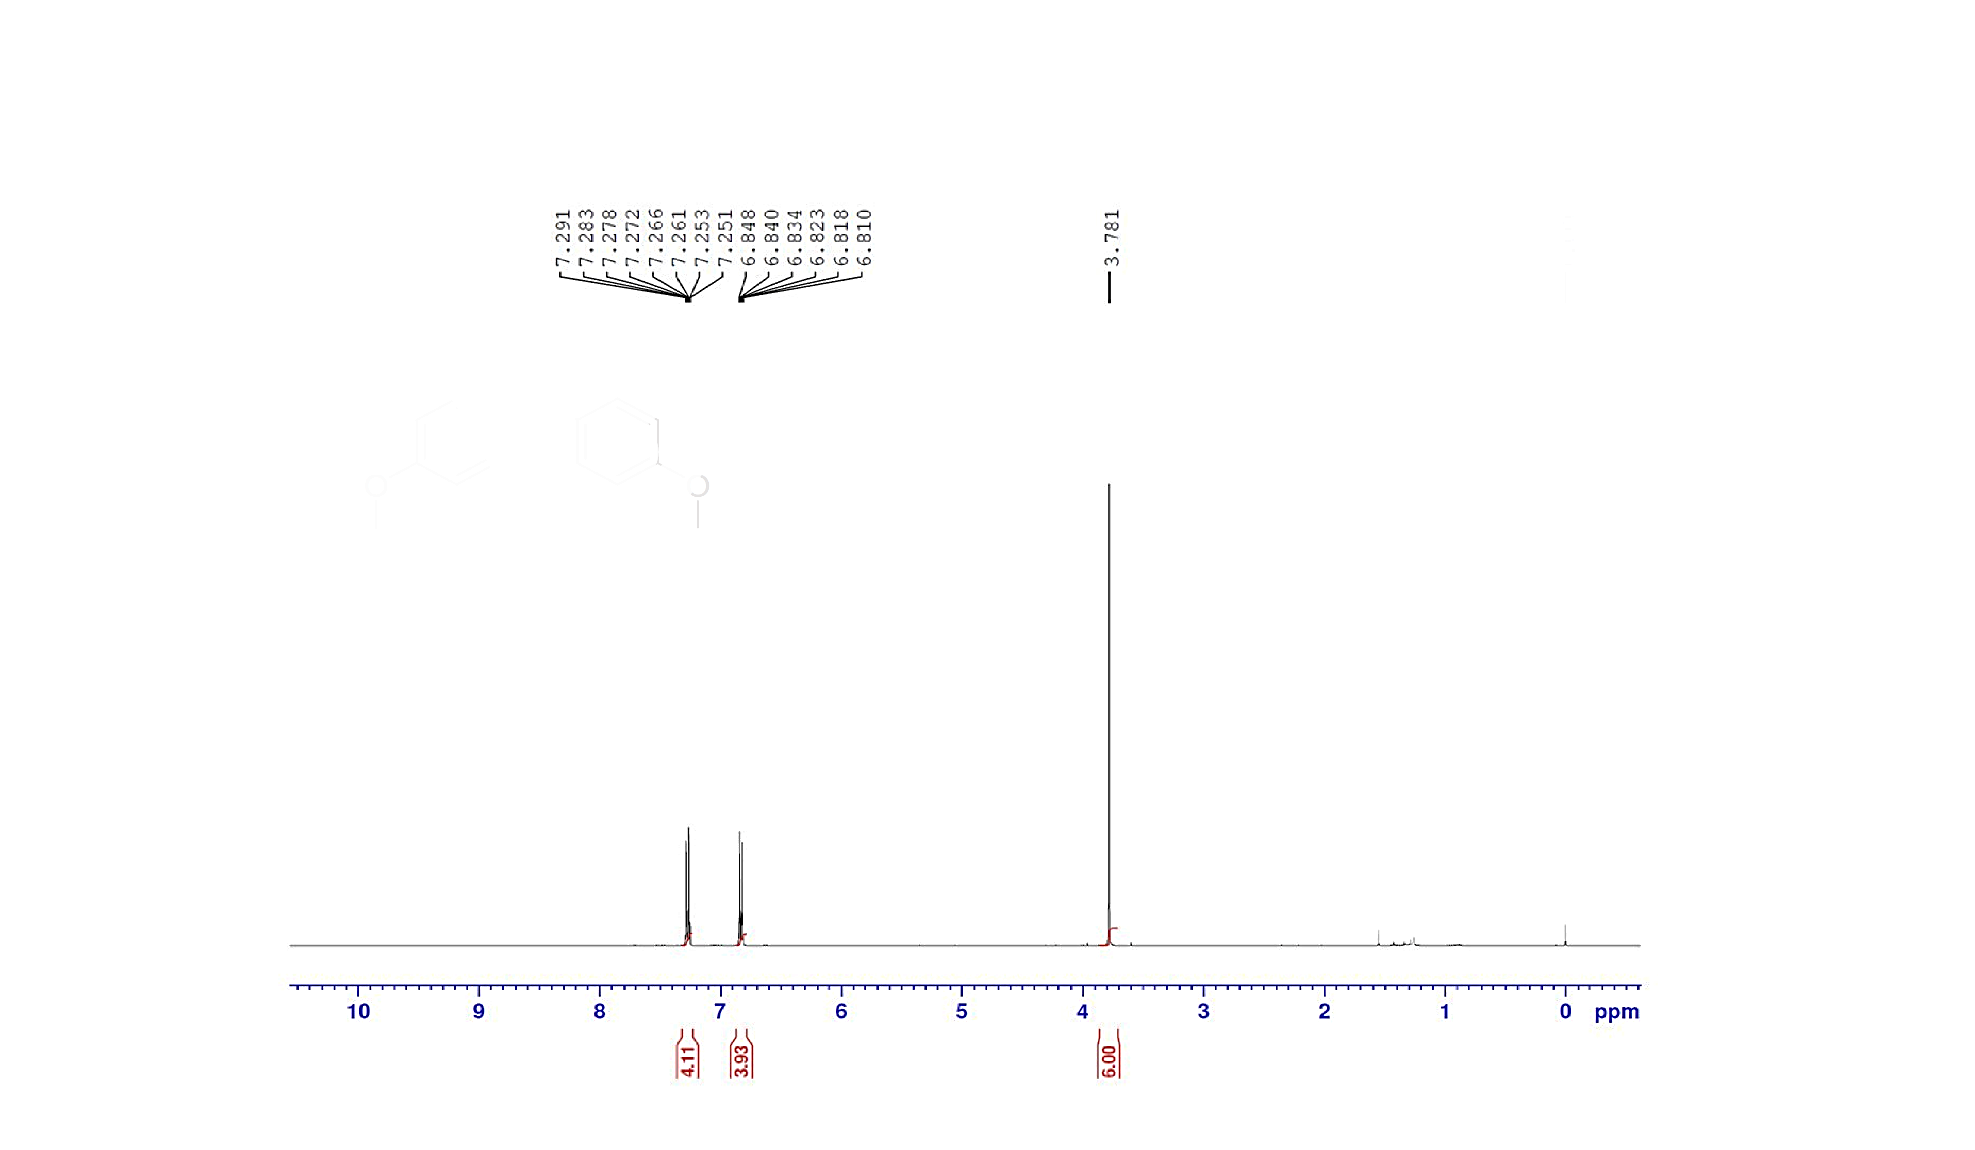


**Figure 13**: 1H NMR (400 MHz, CDCl3) of Bis(4-methoxyphenyl)sulfane (**6f**).

**
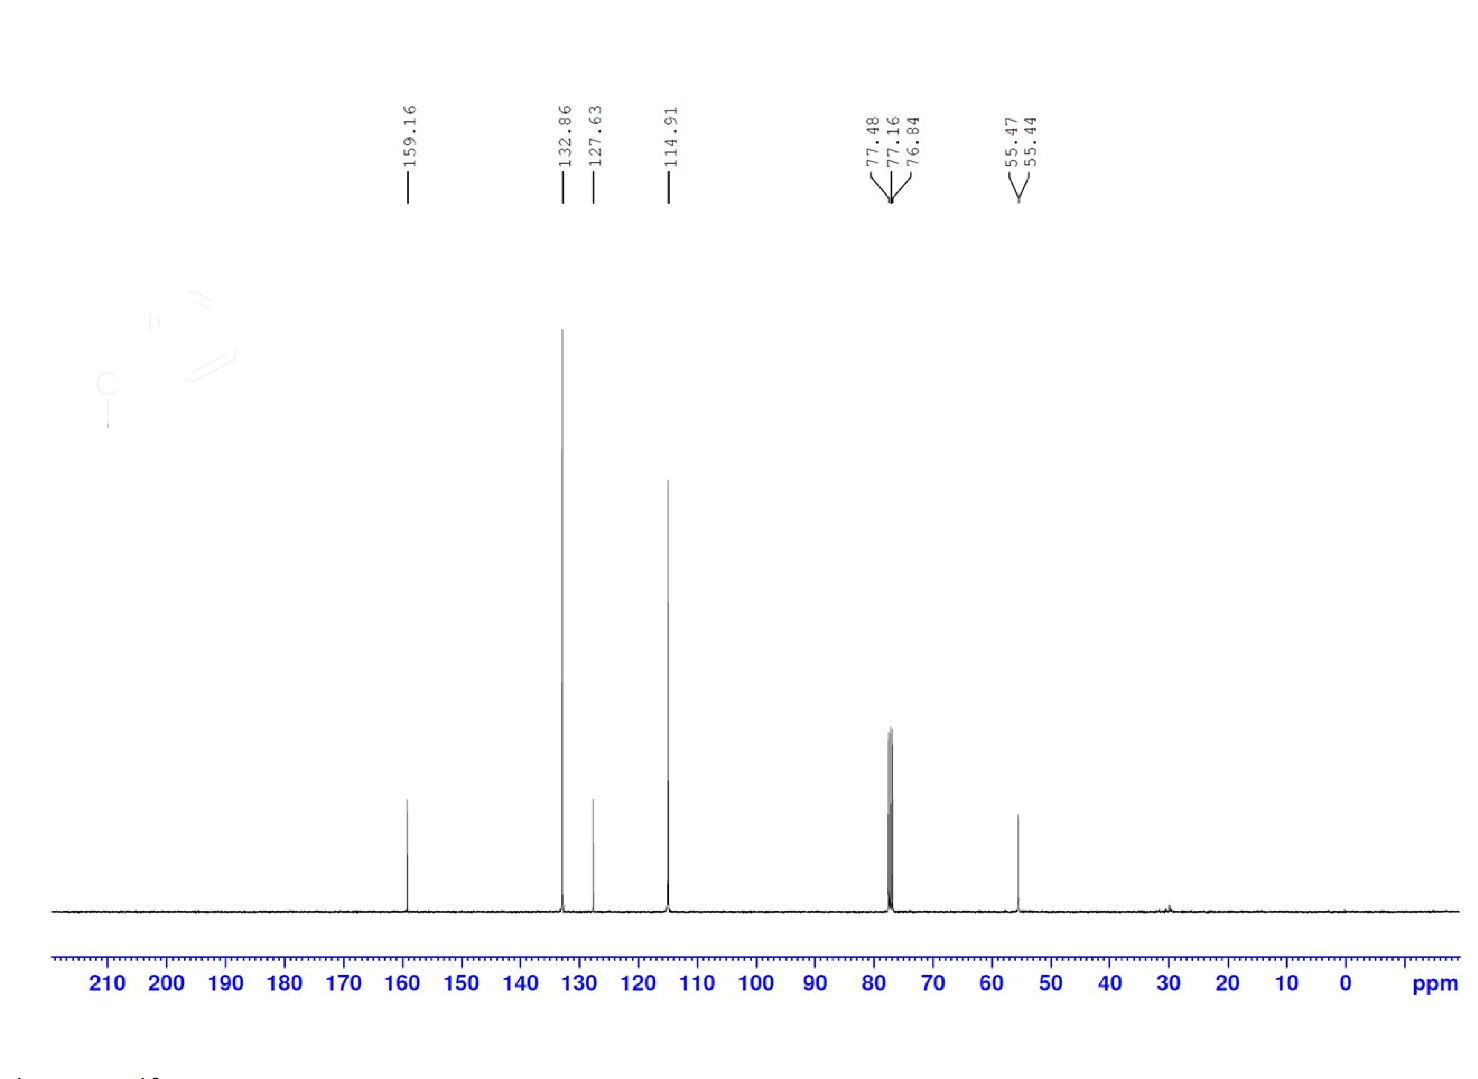
**

**Figure 14**: 13C NMR (100 MHz, CDCl3) of Bis(4-methoxyphenyl)sulfane (**6f**).


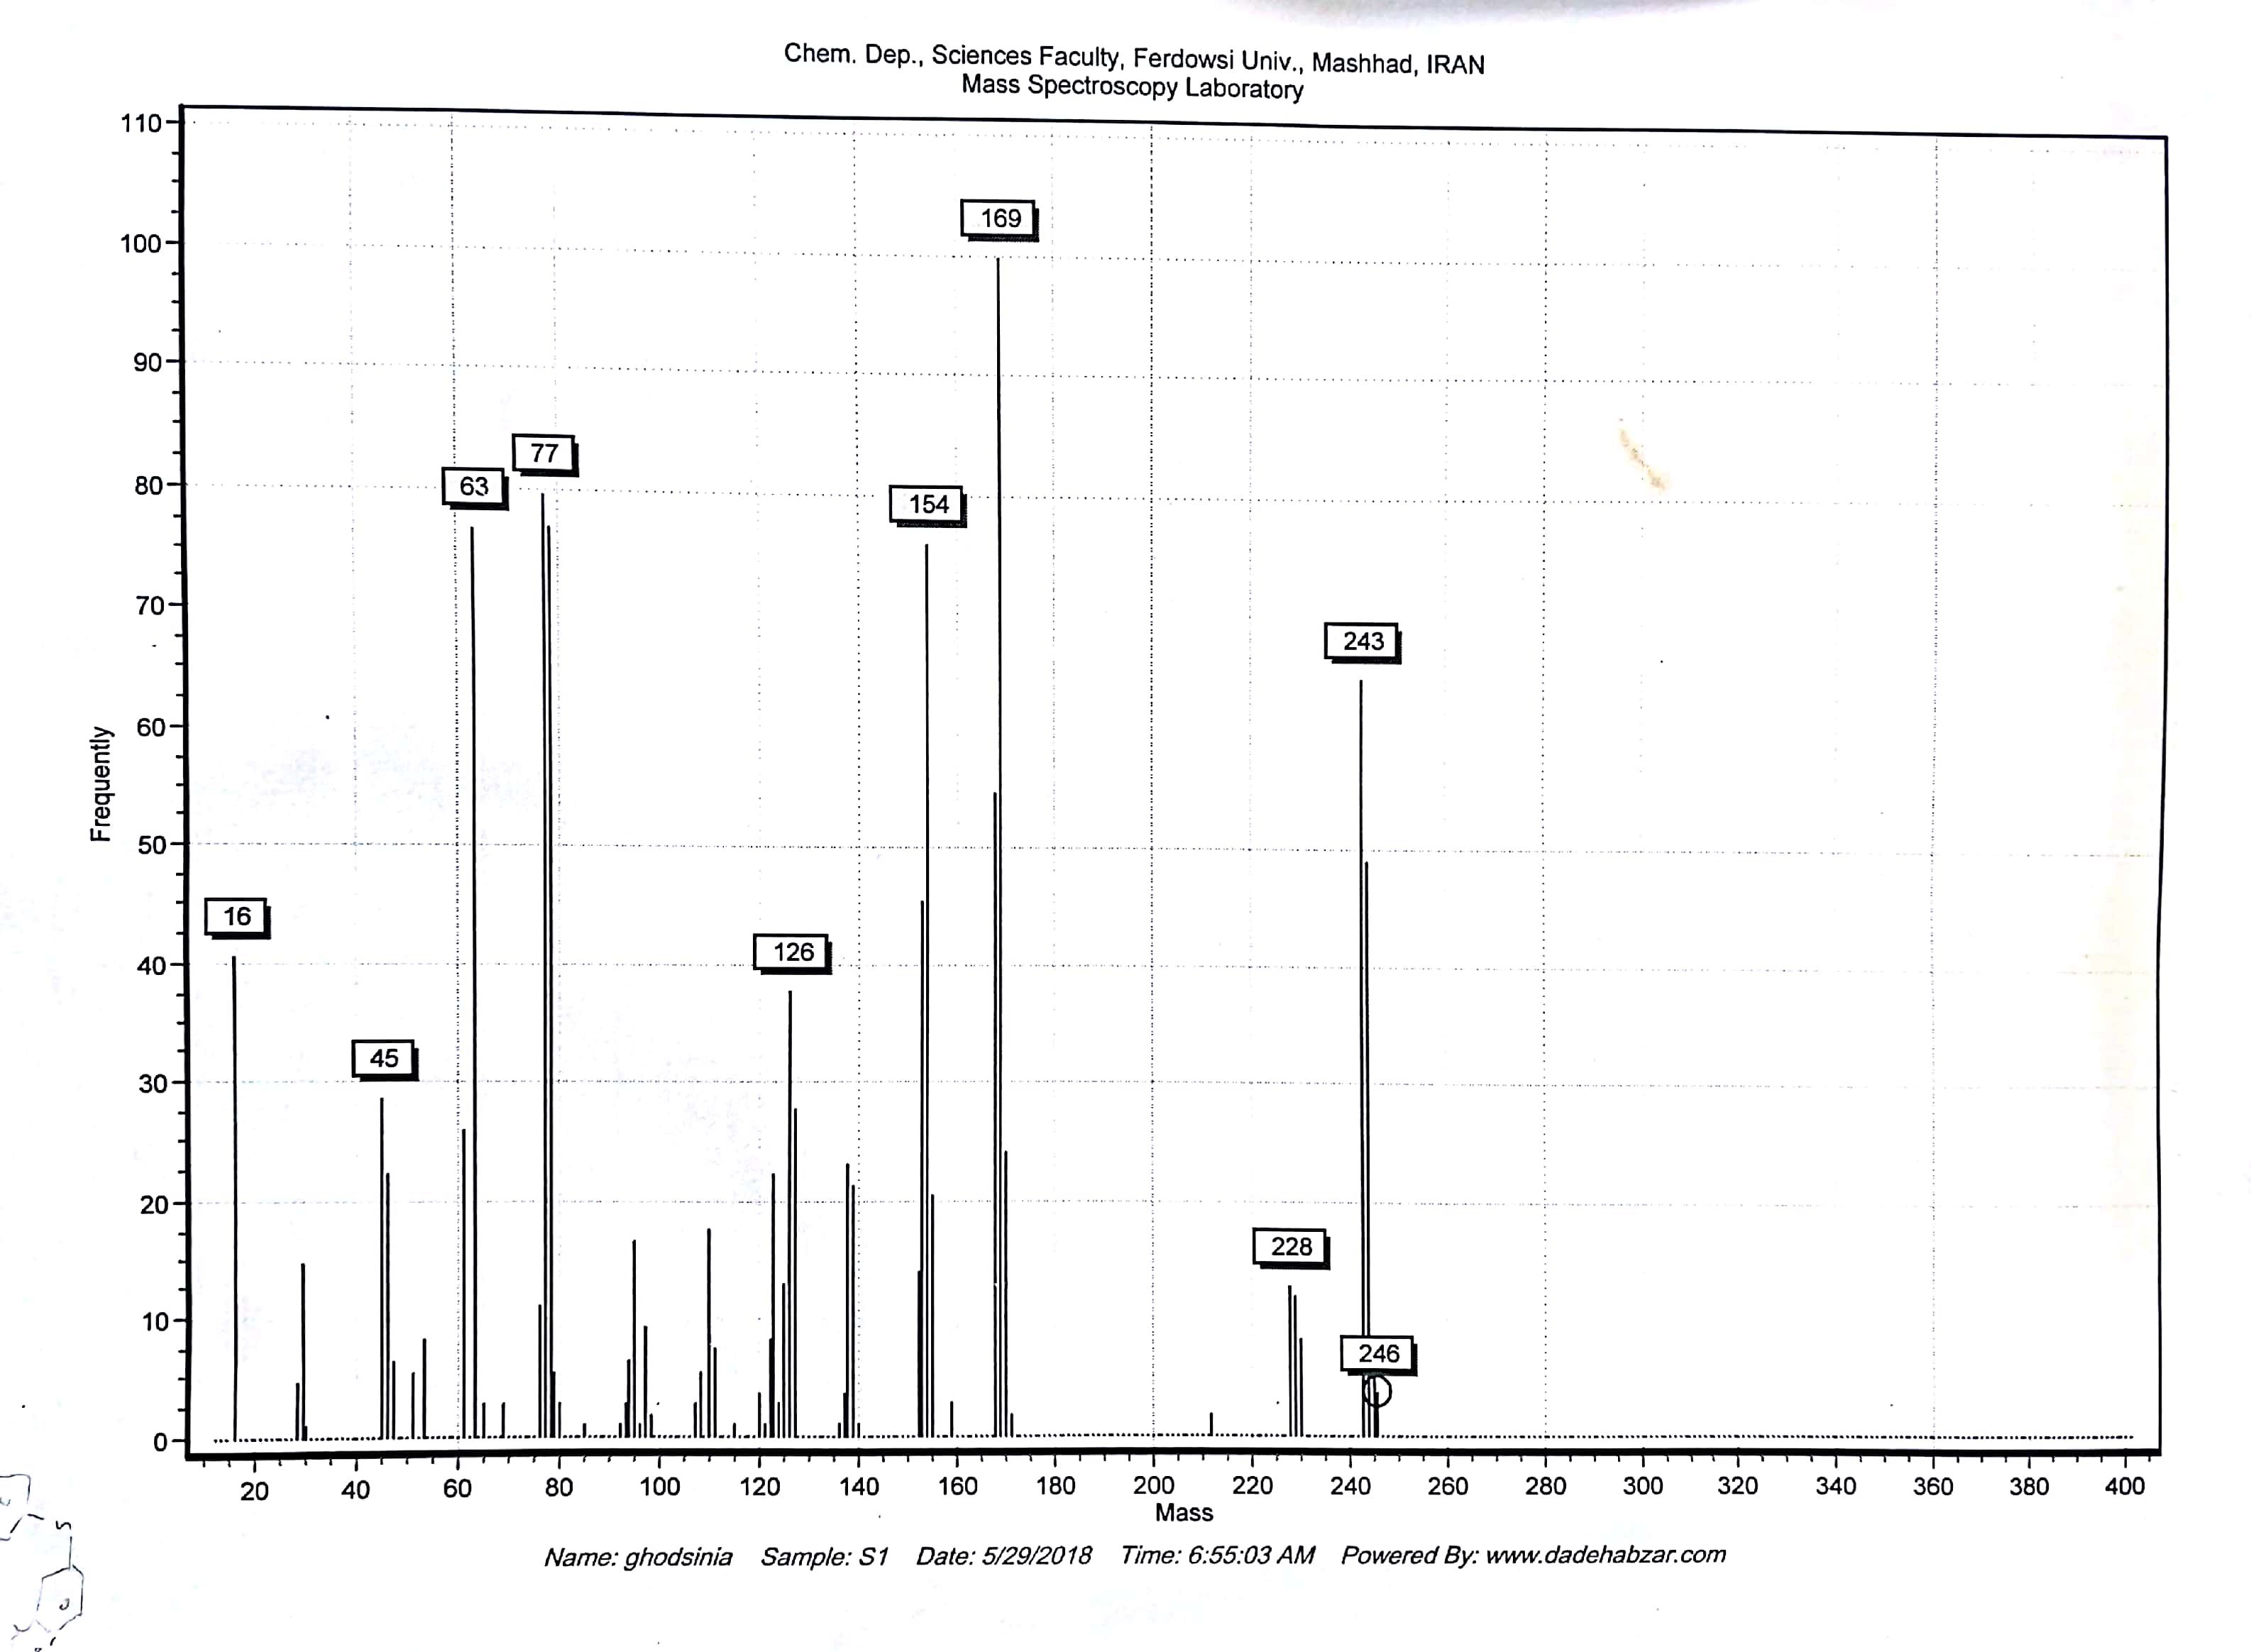


**Figure 15**: Mass spectrum of Bis(4-methoxyphenyl)sulfane (**6f**).

**4,4'-Thiodianiline[1] (7g)**

4,4'-Thiodianiline (0.177 g, 82%); Brown solid; mp 107-108 °C (Lit. 107-108 °C); 1H NMR (400 MHz, CDCl3): δ [ppm] = 7.15 (d, *J* = 8.0 Hz, 4 H, Ar-H), 6.60 (d, *J* = 8.0 Hz, 4 H, Ar-H), 3.67 (s, 4 H, NH2); 13C NMR (100 MHz, CDCl3): δ [ppm] = 145.8, 132.9, 125.2, 115.9.


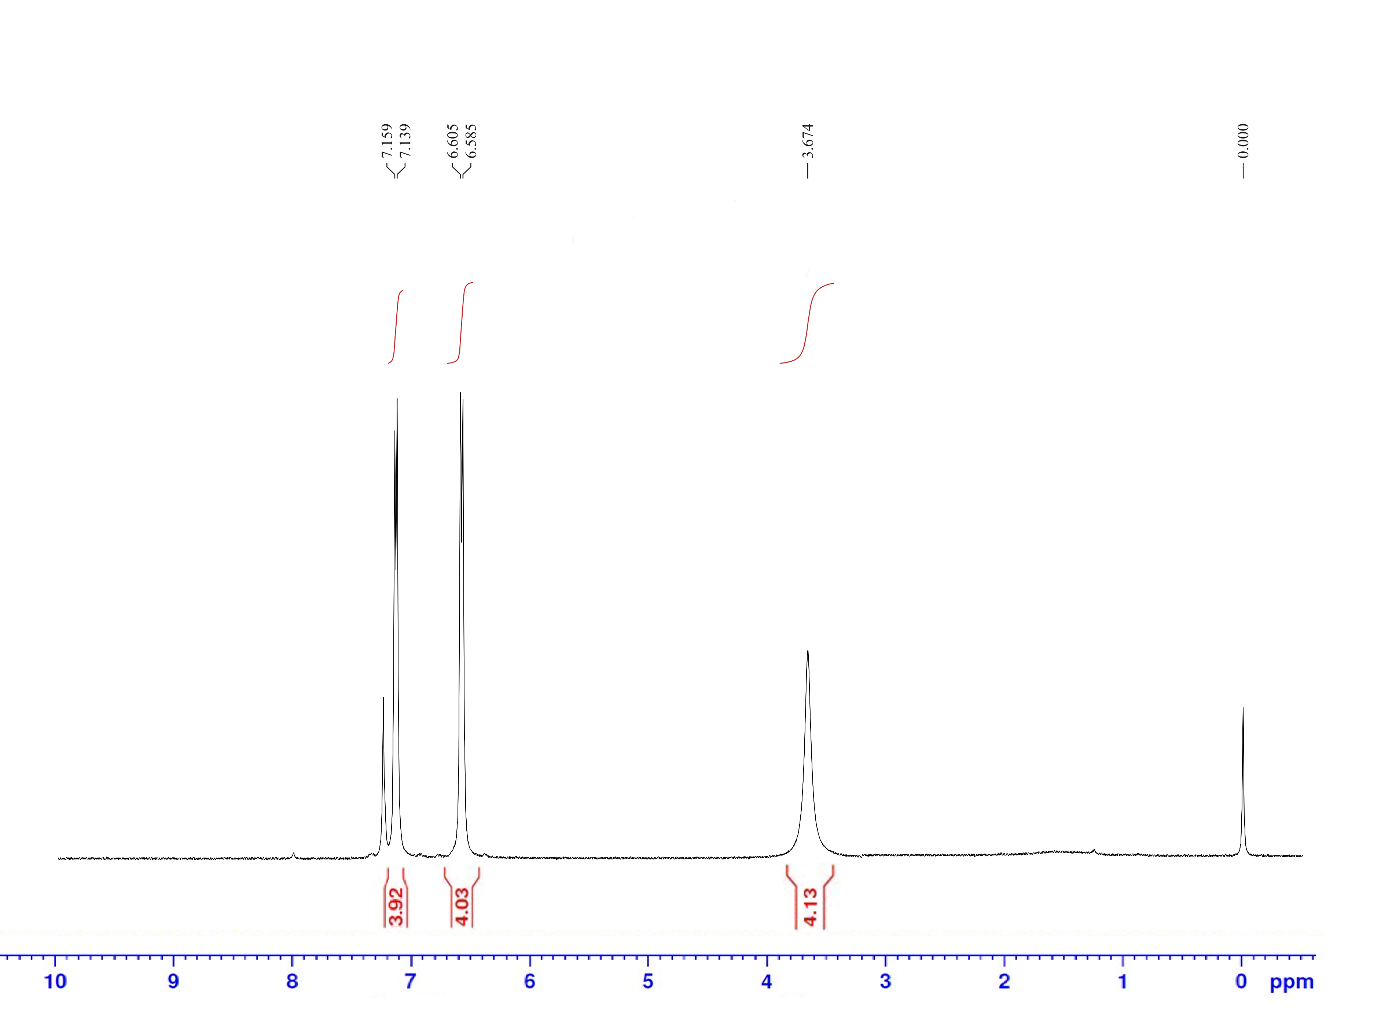


**Figure 16**: 1H NMR (400 MHz, CDCl3) of 4,4'-Thiodianiline (**7g**).


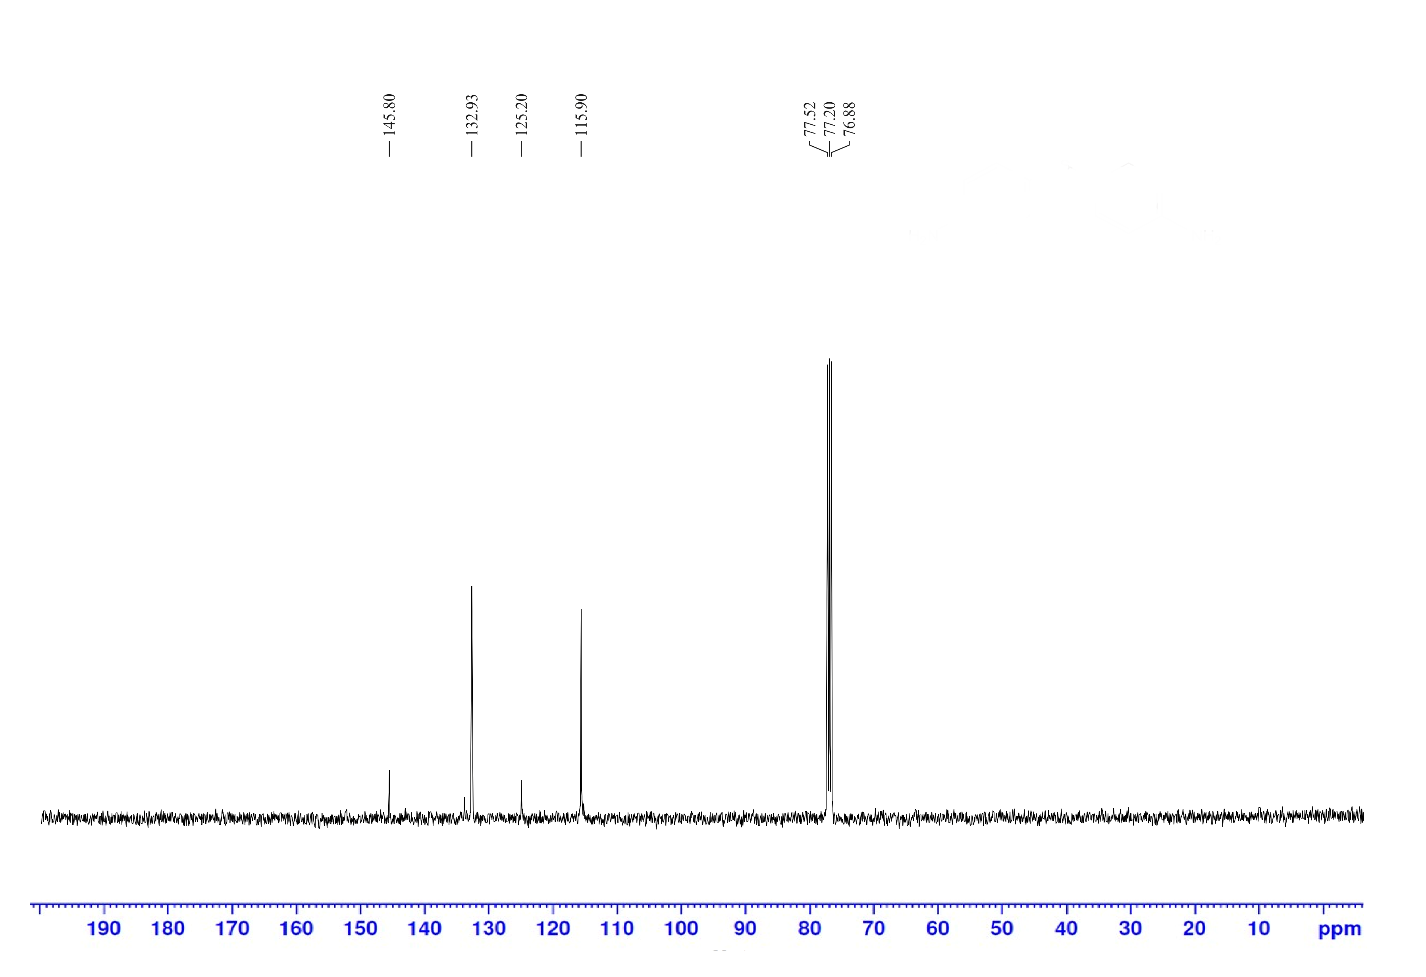


**Figure 17**: 13C NMR (100 MHz, CDCl3) of 4,4'-Thiodianiline (**7g**).

**Di (thiophen-2-yl) sulfane[1] (8h)**

Di (thiophen-2-yl) sulfane (0.146 g, 74%); Yellow liquid; 1H NMR (400 MHz, CDCl3): δ [ppm] = 7.63–7.53 (m, 2H), 7.45–7.34 (m, 2H), 7.27–7.11 (m, 2H); 13C NMR (100MHz, CDCl3): δ [ppm] = 135.5, 132.7, 129.6, 137.47.


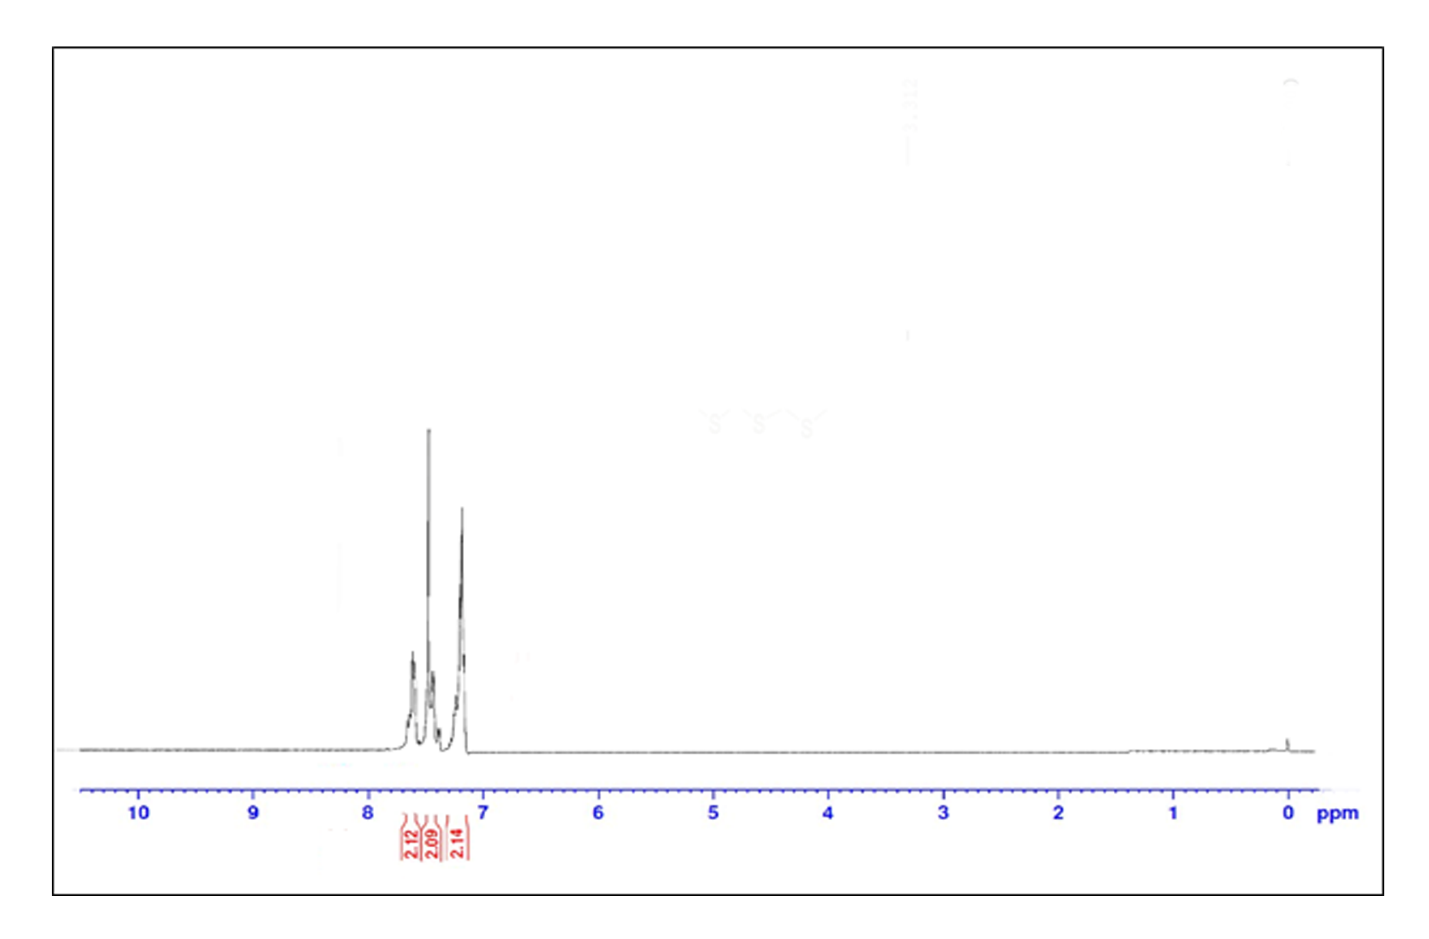


**Figure 18**: 1H NMR (400 MHz, CDCl3) of Di (thiophen-2-yl) sulfane (**8h**).

**
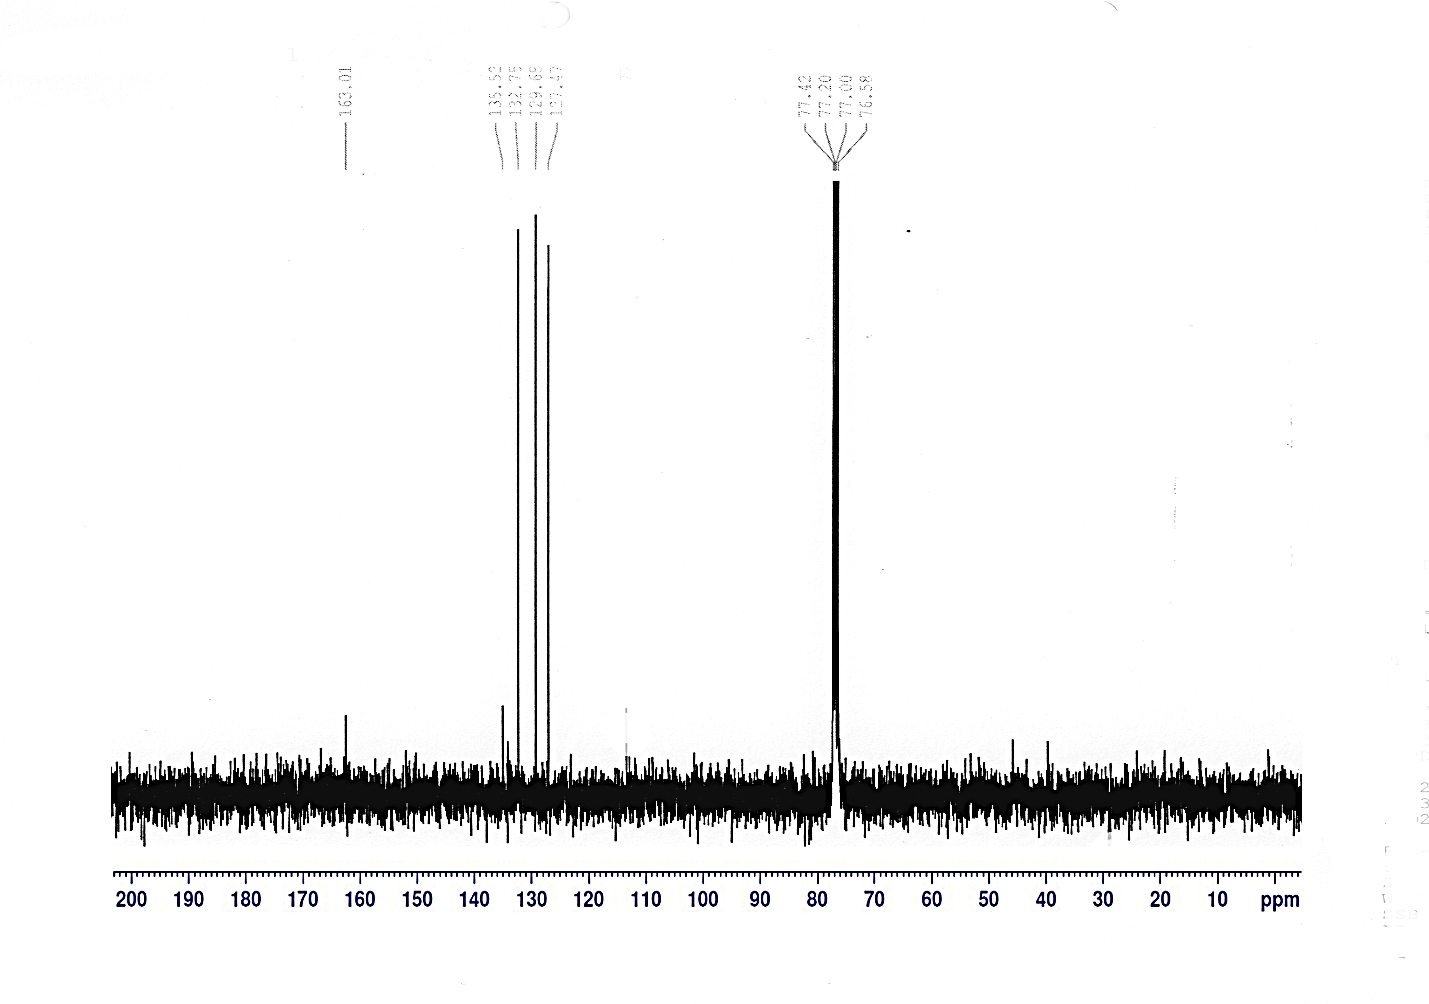
**

**Figure 19**: 13C NMR (100 MHz, CDCl3) of Di (thiophen-2-yl) sulfane (**8h**).

**Di (naphthalen-1-yl) sulfane[3] (9i)**

Di (naphthalen-1-yl) sulfane (0.214 g, 75%); White solid; mp 156-157 °C (Lit. 156-158 °C); 1H NMR (400 MHz, CDCl3): δ [ppm] = 8.43–8.40 (m, 2 H, Ar-H), 7.89–7.87 (m, 2 H, Ar-H), 7.78–7.76 (m, 2 H, Ar-H), 7.55–7.51 (m, 4 H, Ar-H), 7.32–7.30 (m, 4 H, Ar-H); 13C NMR (100 MHz, CDCl3): δ [ppm] = 134.3, 132.8, 132.6, 130.1, 128.8, 128.2, 126.9, 126.6, 126.0, 125.3; MS (70 eV, EI), *m/z* (%): 286 (M+,8%), 285 (M-1, 52%), 282 (M-4, 90%), 127 (C10H7, 60%).


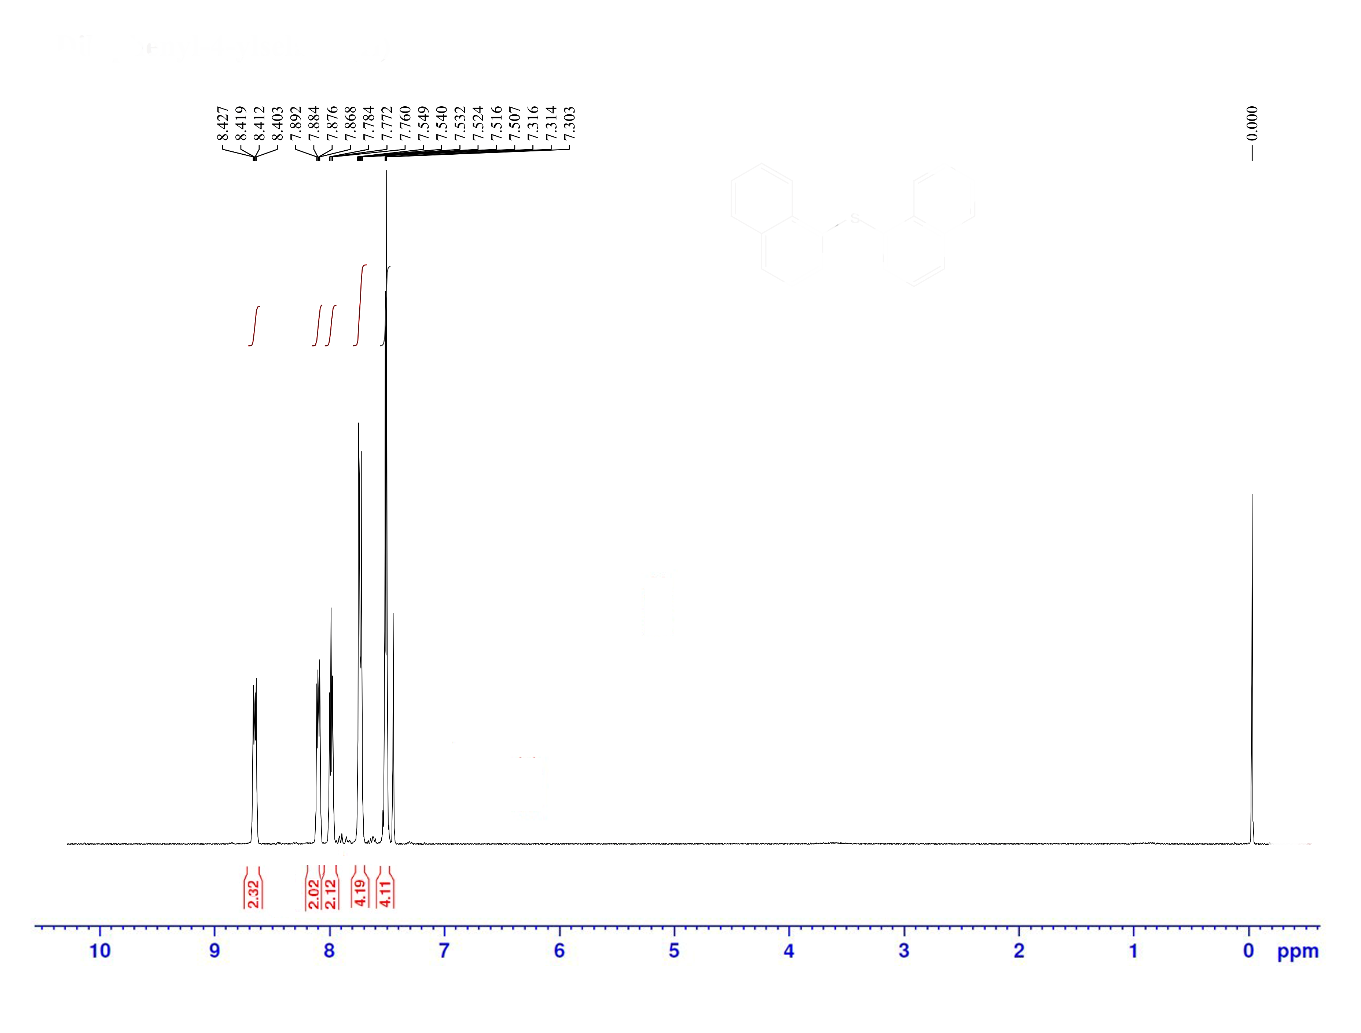


**Figure 20**: 1H NMR (400 MHz, CDCl3) of Di(naphthalen-1-yl)sulfane (**9i**).


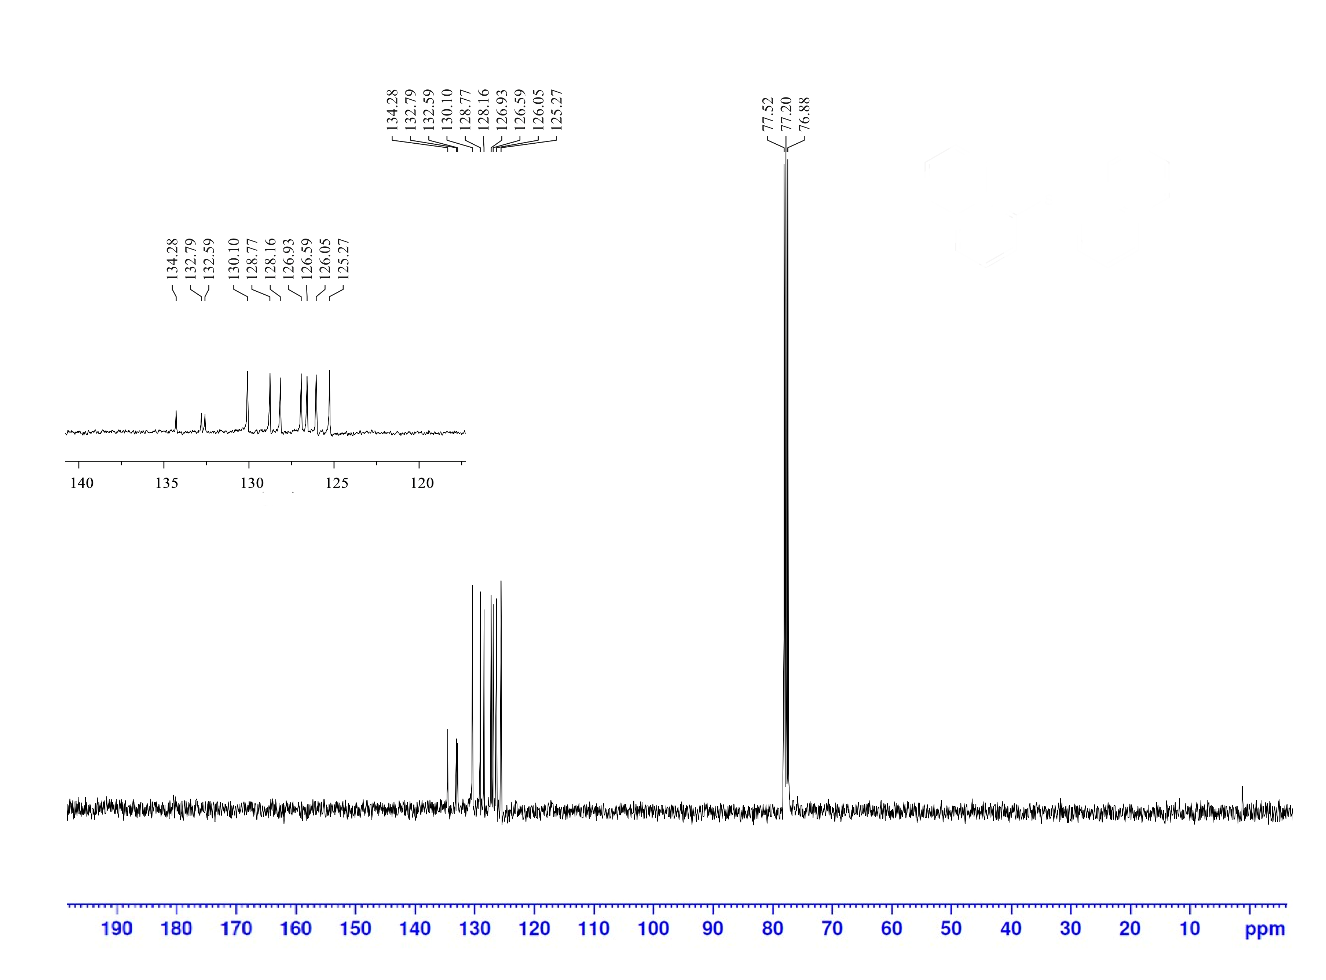


**Figure 21**: 13C NMR (100 MHz, CDCl3) of Di(naphthalen-1-yl)sulfane (**9i**).


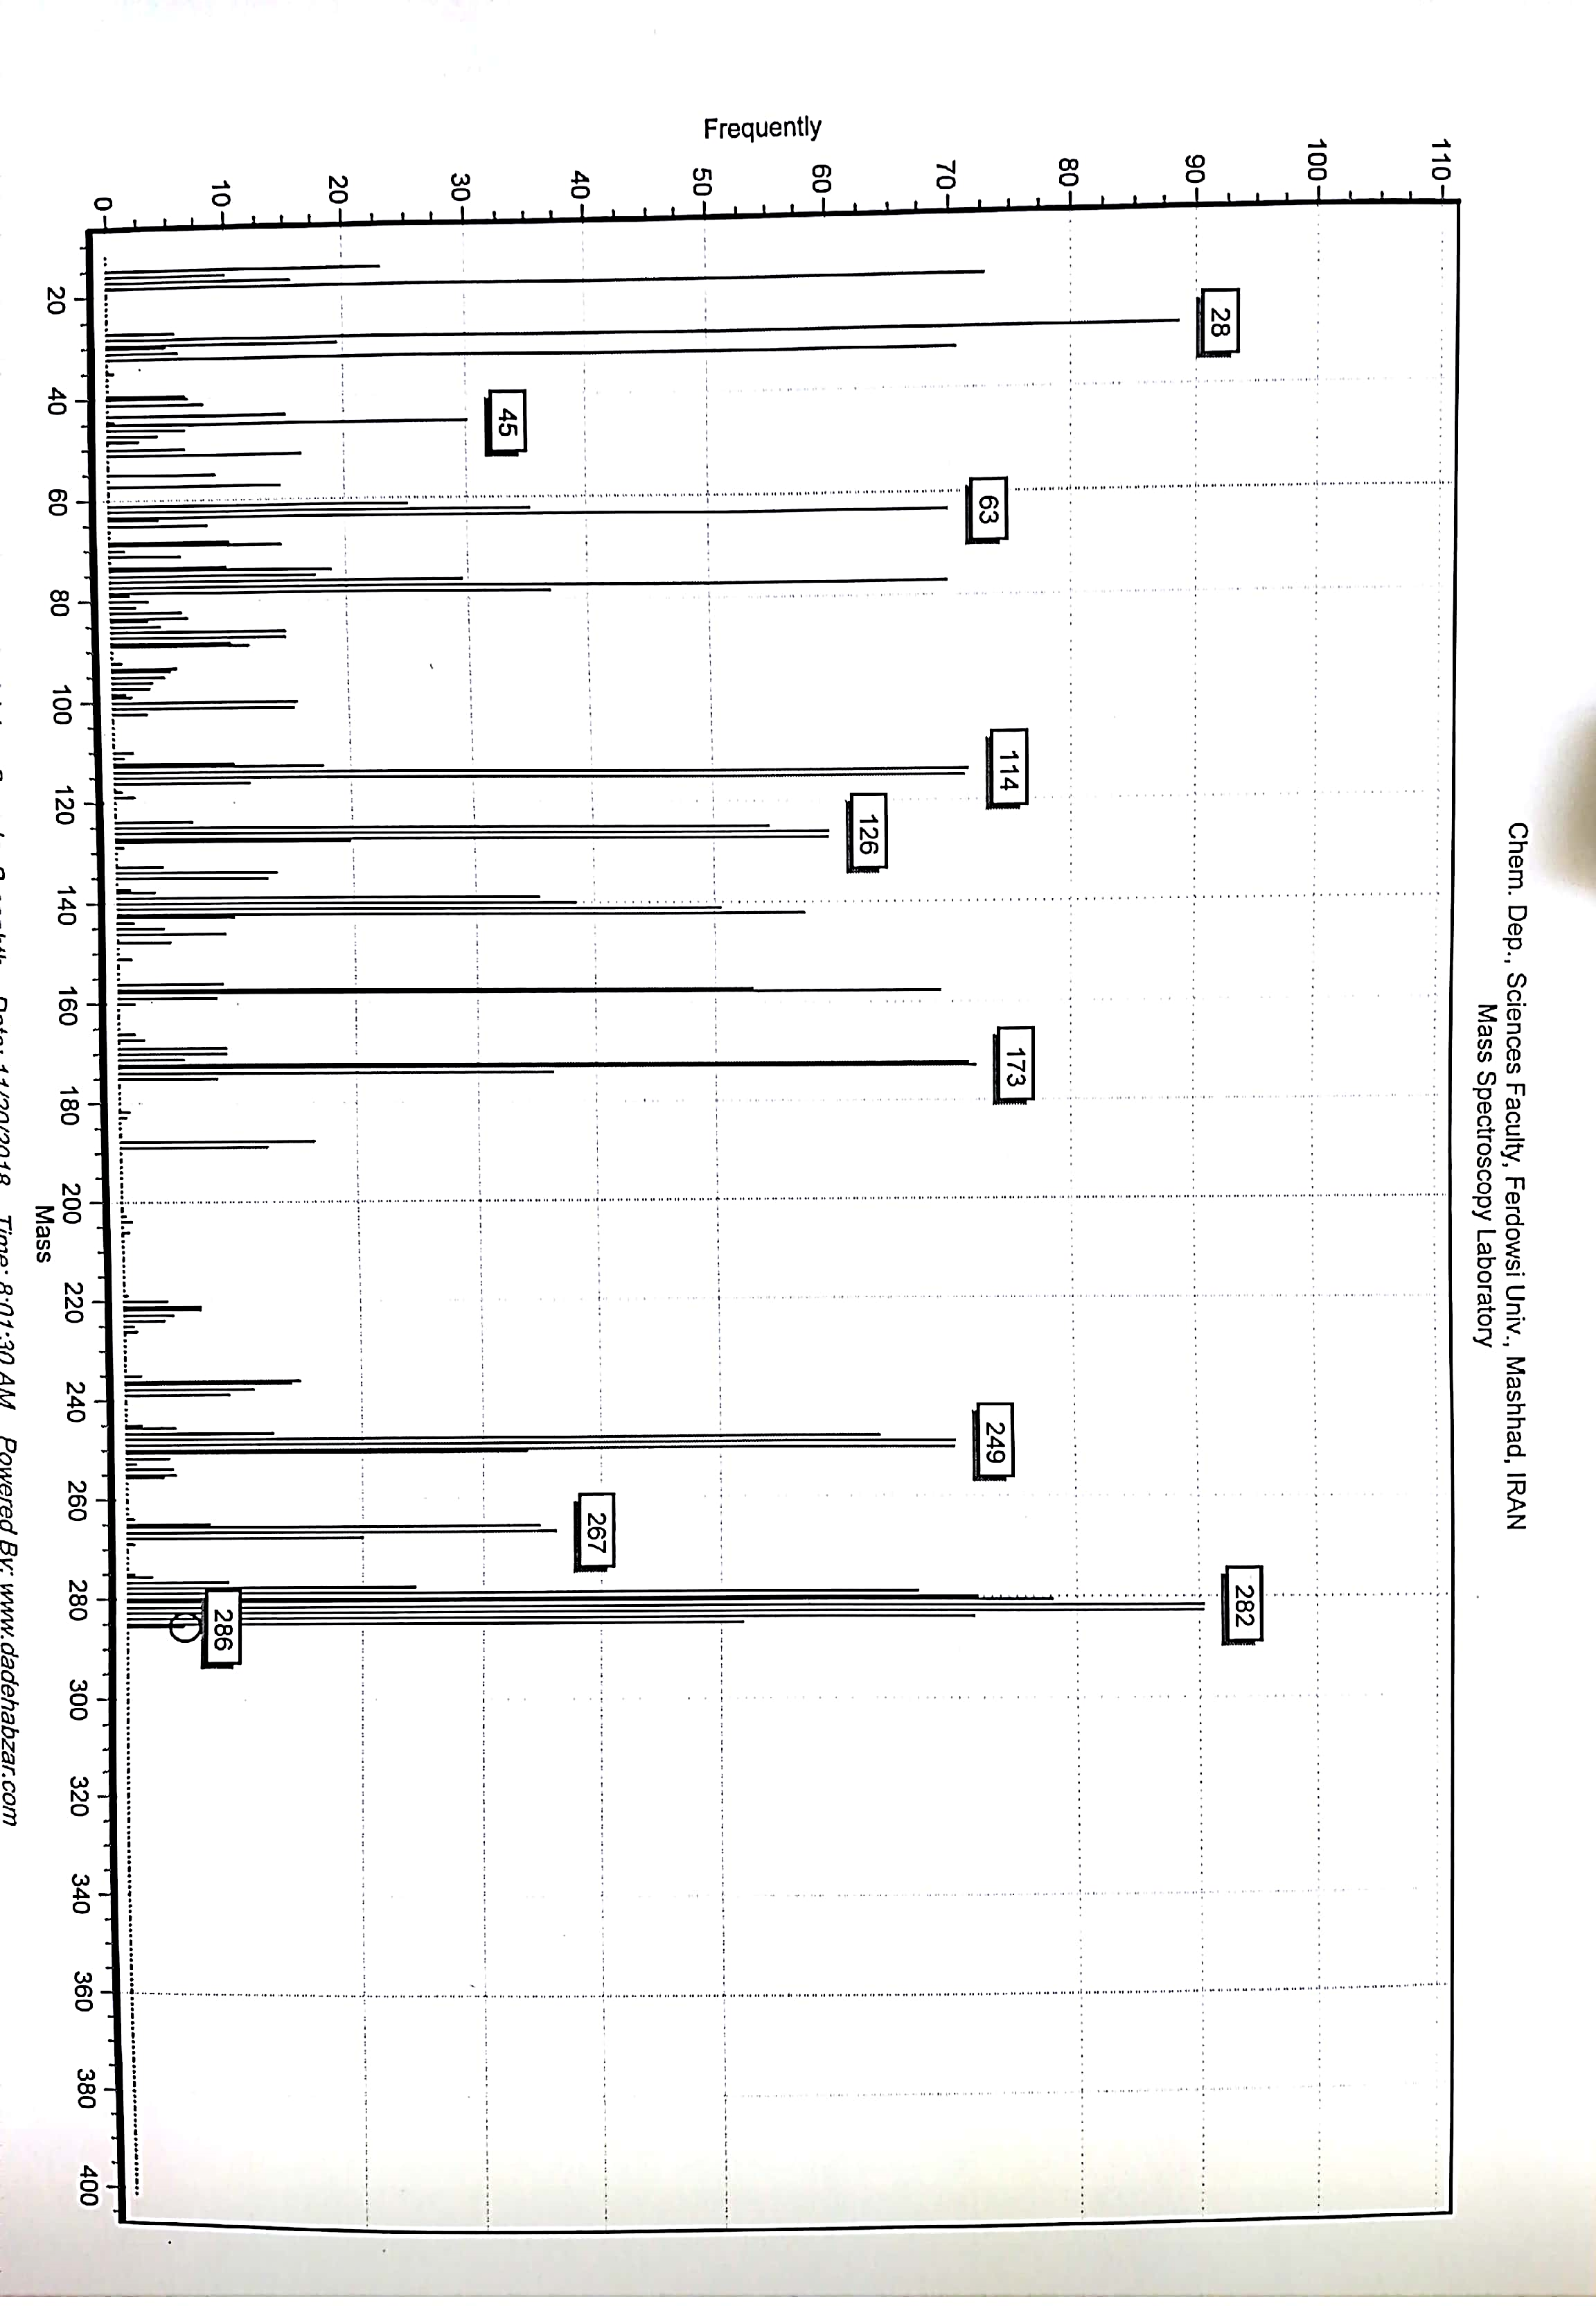


**Figure 22**: Mass spectrum of Di(naphthalen-1-yl)sulfane (**9i**).

**4,4'-Thiodiphenol[1] (11k)**

4,4'-Thiodiphenol (0.137 g, 63%); White solid; mp 151-153 °C (Lit. 150-153 °C); 1H NMR (400 MHz, (400 MHz, DMSO-*d6*): δ [ppm] = 9.62 (s, 2H), 7.14 (d, *J* = 8.4 Hz, 4H), 6.73 (d, *J* = 8.4 Hz, 4H); 13C NMR (100 MHz, DMSO-*d6*): δ [ppm] = 157.0, 132.7, 124.7, 116.3.


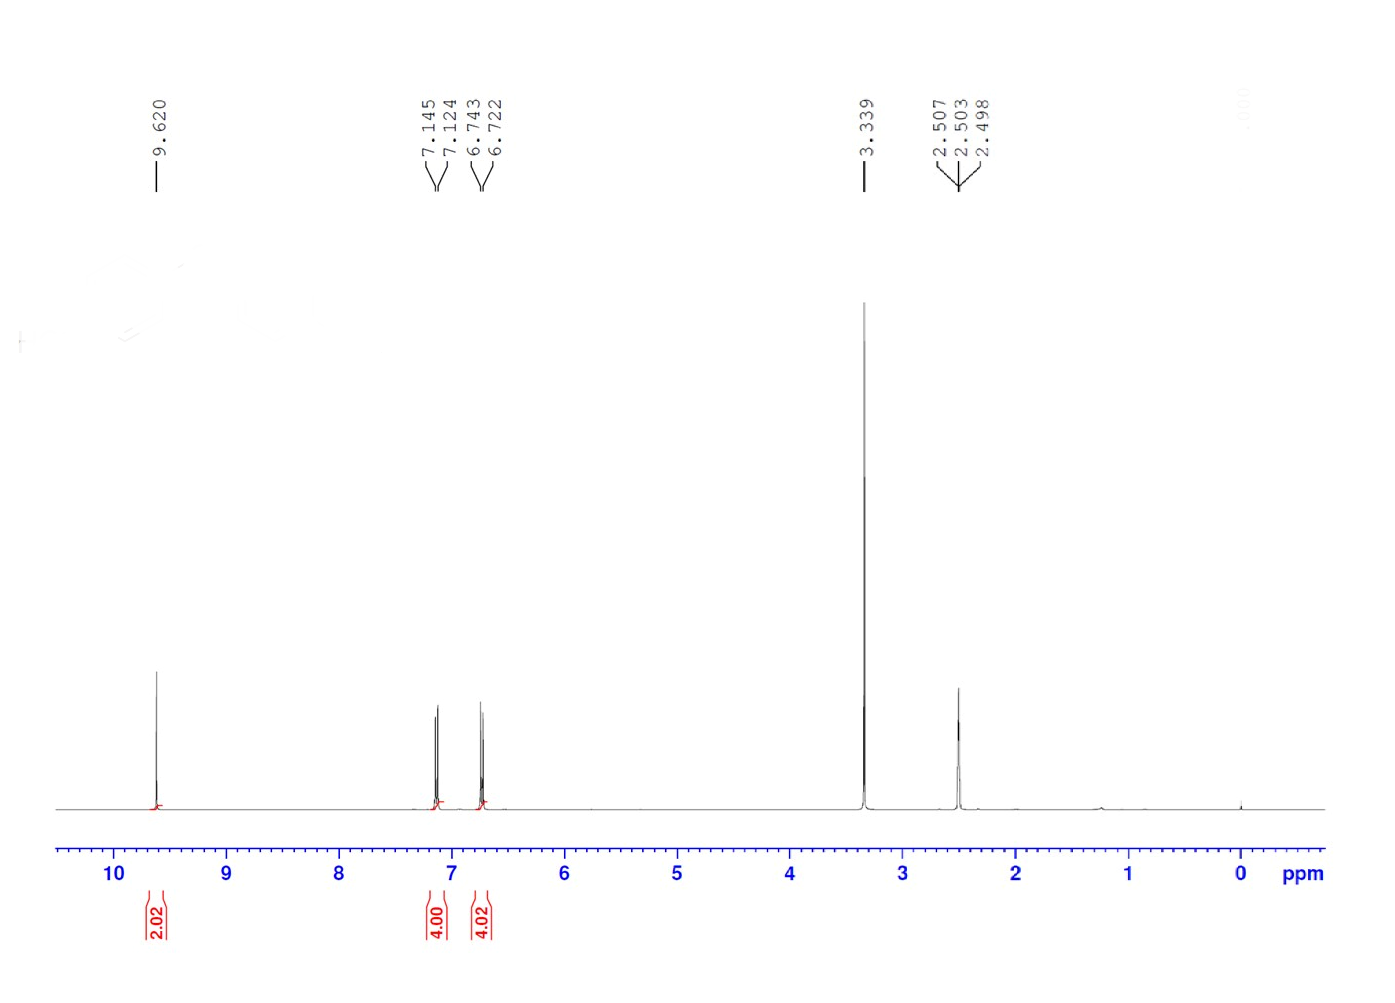


**Figure 23**: 1H NMR (400 MHz, DMSO-*d6*) of 4,4'-Thiodiphenol (**11k)**.


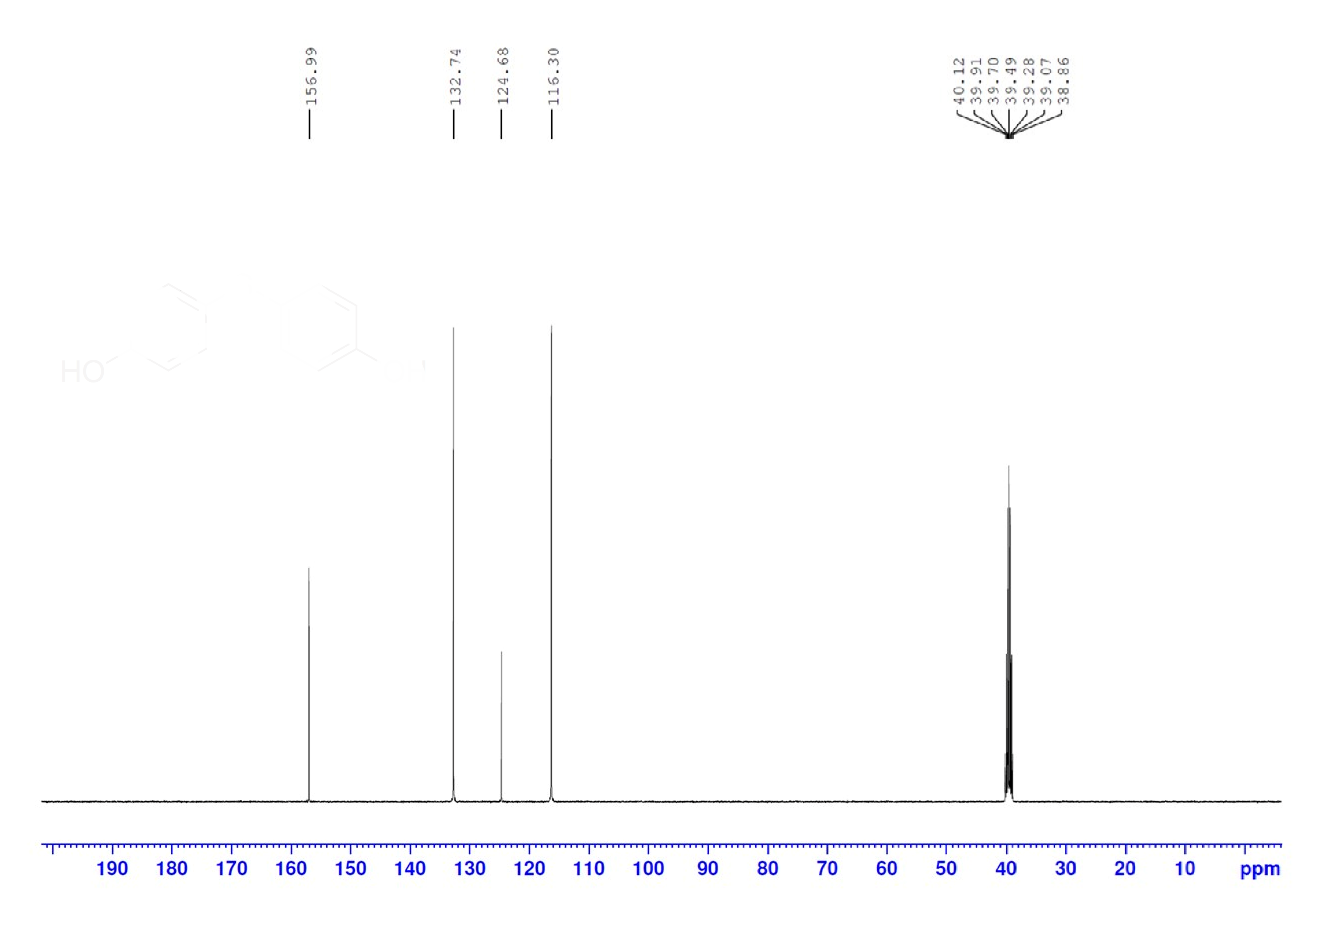


**Figure 24**: 13C NMR (100 MHz, DMSO-*d6*) of 4,4'-Thiodiphenol (**11k**).

**References**

[1] Ghodsinia SS, Akhlaghinia B. Cu (I) anchored onto mesoporous SBA-16 functionalized by aminated 3-glycidyloxypropyltrimethoxysilane with thiosemicarbazide (SBA-16/GPTMS-TSC-Cu (I)): a heterogeneous mesostructured catalyst for S-arylation reaction under solvent-free conditions. Green Chem. 2019;21(11):3029-3049.

[2] Ma X, Yu J, Jiang M, et al. Mild and regioselective bromination of phenols with TMSBr. Eur J Org Chem. 2019;2019(28): 4593-4596.

[3] Ghorbani-Choghamarani A, Taherinia Z. Synthesis of peptide nanofibers decorated with palladium nanoparticles and its application as an efficient catalyst for the synthesis of sulfides *via* reaction of aryl halides with thiourea or 2-mercaptobenzothiazole. RSC Adv. 2016;6(64):59410-59421.
